# Supplementary material for: New rRNA Gene-Based Phylogenies of the Alphaproteobacteria Provide Perspective on Major Groups, Mitochondrial Ancestry and Phylogenetic Instability
Source: PLoS One. 2013 Dec 11;8(12):e83383. doi: 10.1371/journal.pone.0083383 (PMC3859672; doi:10.1371/journal.pone.0083383)
Supplement: Table S2 — Approximately Unbiased (AU) test results. (XLSX) [file pone.0083383.s022.xlsx]

## Sheet: mt pruned
			4	5	10	11	0	6	1	7	3	9	2	8
(WARNING: FORMULA TABLE!)			arb-bij_bacteria-gb	arb-bij_bacteria_mtDel	mus-bij_bacteria-gb	mus-bij_bacteria_mtDel	arb-16SRed_bacteria-gb	mus-16SRed_bacteria-gb	arb-23S_bacteria-gb	mus-23S_bacteria-gb	arb-bij_bacteria-gb-RY	mus-bij_bacteria-gb-RY	arb-bij_bacteria-RYKM	mus-bij_bacteria-RYKM			significance count	Fisher's method	Fisher Γ+CAT				Natural Logarithm																sum	geo	Log fisher
	4	arb reg cat	0.706	0.062	0.147	0.061	1e-59	6e-101	0.002	2e-60	0.003	0.004	0.079	0.032	12		5	7.582e-211	1.23848e-289	0	arb 16S cat			-0.34814	-2.78062	-1.91732	-2.79688	-135.853	-230.769	-6.21461	-137.462	-5.80914	-5.52146	-2.53831	-3.44202				-535.452	4.18152e-20	7.582e-211
	5	arb reg gamma	0.763	0.069	0.269	0.17	8e-53	3e-37	0.009	0.003	0.001	8e-05	0.108	0.055			6	3.25345e-87		1	arb 16S gamma			-0.270497	-2.67365	-1.31304	-1.77196	-119.958	-84.097	-4.71053	-5.80914	-6.90776	-9.43348	-2.22562	-2.90042				-236.945	5.12418e-11	8.41477e-88
MT	24	arb reg mt cat	0.077	0.502	0.045	0.039	5e-05	7e-07	0.004	0.0003	0.006	0.01	0.02	0.02			2	1.75434e-16	4.99205e-68	2	arb 23S cat			-2.56395	-0.689155	-3.10109	-3.24419	-9.90349	-14.1722	-5.52146	-8.11173	-5.116	-4.60517	-3.91202	-3.91202				-57.0284	0.00333647	3.55558e-15
MT	25	arb reg mt gamma	0.096	0.528	0.094	0.072	7e-50	0.0001	0.001	0.001	1e-05	0.005	0.007	0.009			4	7.24617e-58		3	arb 23S gamma			-2.34341	-0.638659	-2.36446	-2.63109	-113.183	-9.21034	-6.90776	-6.90776	-11.5129	-5.29832	-4.96185	-4.71053				-160.998	1.01846e-07	2.54608e-56
	14	mus reg cat	0.248	0.069	0.527	0.093	7e-47	1e-45	0.004	0.02	0.013	0.011	0.007	0.111			5	2.32676e-87	4.98638e-128	4	arb reg cat			-1.39433	-2.67365	-0.640555	-2.37516	-106.276	-103.616	-5.52146	-3.91202	-4.34281	-4.50986	-4.96185	-2.19823				-235.262	6.06334e-11	4.24797e-87
	15	mus reg gamma	0.572	0.1	0.85	0.344	1e-37	1e-10	0.014	0.03	0.004	0.006	0.016	0.116			5	2.72103e-44		5	arb reg gamma			-0.558616	-2.30259	-0.162519	-1.06711	-85.1956	-23.0259	-4.2687	-3.50656	-5.52146	-5.116	-4.13517	-2.15417				-130.725	2.10225e-06	5.5593e-44
MT	34	mus reg mt cat	0.135	0.155	0.26	0.609	3e-05	3e-05	0.001	0.001	0.0002	7e-155	0.005	0.04			4	1.2591e-158	6.97649e-247	6	arb RY cat			-2.00248	-1.86433	-1.34707	-0.495937	-10.4143	-10.4143	-6.90776	-6.90776	-8.51719	-354.955	-5.29832	-3.21888				-403.826	2.89776e-18	3.36028e-158
MT	35	mus reg mt gamma	0.067	0.048	0.123	0.55	8e-79	2e-10	0.001	0.002	0.002	5e-08	0.0004	0.007			3	1.83414e-94		7	arb RY gamma			-2.70306	-3.03655	-2.09557	-0.597837	-179.825	-22.3327	-6.90776	-6.21461	-6.21461	-16.8112	-7.82405	-4.96185				-246.739	1.9243e-11	6.74801e-92
	0	arb 16S cat	0.003	0.007	4e-43	6e-06	0.6	0.107	7e-33	2e-51	2e-05	7e-07	2e-87	2e-45			2	4.8946e-256	0	8	arb RYMK cat			-5.80914	-4.96185	-97.6249	-12.0238	-0.510826	-2.23493	-74.0394	-116.739	-10.8198	-14.1722	-199.632	-102.923				-338.935	1.90644e-15	1.05965e-130
	1	arb 16S gamma	2e-05	0.001	5e-68	0.0002	0.762	0.125	7e-95	2e-30	6e-58	5e-52	8e-53	3e-59			2	0		9	arb RYMK gamma			-10.8198	-6.90776	-154.966	-8.51719	-0.271809	-2.07944	-216.8	-68.3844	-131.758	-118.125	-119.958	-134.754				-718.63	6.17042e-32	1.14128e-292
MT	20	arb 16S mt cat	8e-05	1e-48	3e-71	8e-28	0.013	0.004	3e-07	9e-09	1e-34	4e-57	6e-62	9e-46			0	0	0	10	mus 16S cat			-9.43348	-110.524	-162.385	-62.3929	-4.34281	-5.52146	-15.0195	-18.526	-78.2879	-129.861	-140.969	-103.722				-596.294	1.26845e-26	2.87544e-240
MT	21	arb 16S mt gamma	2e-53	3e-67	6e-05	8e-53	0.002	0.003	2e-08	8e-115	3e-05	2e-31	1e-86	2e-37			0	0		11	mus 16S gamma			-121.344	-153.175	-9.72117	-119.958	-6.21461	-5.80914	-17.7275	-262.718	-10.4143	-70.687	-198.022	-84.5025				-777.768	1.66718e-34	0
	10	mus 16S cat	3e-51	0.001	2e-06	2e-10	0.141	0.637	2e-47	1e-40	0.0003	2e-05	1e-115	3e-131			2	0	4.96652e-295	12	mus 23S cat			-116.333	-6.90776	-13.1224	-22.3327	-1.959	-0.450986	-107.528	-92.1034	-8.11173	-10.8198	-264.797	-300.54				-379.669	3.24468e-17	5.98409e-148
	11	mus 16S gamma	4e-68	0.0002	0.0004	9e-75	0.161	0.673	3e-07	0.001	4e-05	0.0002	1e-71	0.0002			2	6.10724e-220		13	mus 23S gamma			-155.189	-8.51719	-7.82405	-170.497	-1.82635	-0.39601	-15.0195	-6.90776	-10.1266	-8.51719	-163.484	-8.51719				-384.821	1.9384e-17	3.91074e-150
MT	30	mus 16S mt cat	5e-35	6e-05	0.0001	7e-06	0.135	0.157	3e-120	0.001	4e-57	0.0001	6e-10	8e-67			2	1.46755e-284	3.05507e-242	14	mus reg cat			-78.981	-9.72117	-9.21034	-11.8696	-2.00248	-1.85151	-275.212	-6.90776	-129.861	-9.21034	-21.2341	-152.194				-534.827	5.92602e-24	5.35977e-214
MT	31	mus 16S mt gamma	1e-09	0.0003	0.0002	6e-06	0.043	0.133	1e-11	0.0002	0.0002	0.0004	1e-12	2e-08			1	1.54936e-49		15	mus reg gamma			-20.7233	-8.11173	-8.51719	-12.0238	-3.14656	-2.01741	-25.3284	-8.51719	-8.51719	-7.82405	-27.631	-17.7275				-104.727	2.82992e-05	1.50351e-33
	2	arb 23S cat	0.134	0.005	0.021	0.019	0.003	2e-06	0.59	0.288	0.011	0.003	0.0001	0.001			3	1.48932e-15	1.85507e-25	16	mus RY cat			-2.00992	-5.29832	-3.86323	-3.96332	-5.80914	-13.1224	-0.527633	-1.24479	-4.50986	-5.80914	-9.21034	-6.90776				-46.1577	0.00989454	2.91029e-11
	3	arb 23S gamma	0.028	3e-05	0.0002	0.003	6e-05	0.001	0.76	0.17	0.008	0.0002	0.0002	0.007			2	9.10982e-20		17	mus RY gamma			-3.57555	-10.4143	-8.51719	-5.80914	-9.72117	-6.90776	-0.274437	-1.77196	-4.82831	-8.51719	-8.51719	-4.96185				-60.337	0.0023966	2.13891e-16
MT	22	arb 23S mt cat	1e-08	2e-06	1e-52	7e-45	4e-77	1e-18	0.031	0.004	0.001	2e-60	1e-06	1e-06			0	3.16581e-260	0	18	mus RYMK cat			-18.4207	-13.1224	-119.734	-101.67	-175.913	-41.4465	-3.47377	-5.52146	-6.90776	-137.462	-13.8155	-13.8155				-623.672	8.2085e-28	5.54353e-252
MT	22	arb 23S mt cat	1e-08	2e-06	1e-52	7e-45	4e-77	1e-18	0.031	0.004	0.001	2e-60	1e-06	1e-06			0	3.16581e-260		19	mus RYMK gamma			-18.4207	-13.1224	-119.734	-101.67	-175.913	-41.4465	-3.47377	-5.52146	-6.90776	-137.462	-13.8155	-13.8155				-623.672	8.2085e-28	5.54353e-252
	12	mus 23S cat	0.005	0.002	0.018	8e-05	0.0003	5e-32	0.197	0.685	0.007	0.004	0.005	0.01			2	1.62354e-40	8.4592e-97	20	arb 16S mt cat			-5.29832	-6.21461	-4.01738	-9.43348	-8.11173	-72.0733	-1.62455	-0.378336	-4.96185	-5.52146	-5.29832	-4.60517				-117.635	7.78353e-06	1.04973e-38
	13	mus 23S gamma	0.003	9e-05	0.01	0.008	0.102	2e-58	0.324	0.692	0.01	0.002	0.005	0.002			3	4.18757e-63		21	arb 16S mt gamma			-5.80914	-9.3157	-4.60517	-4.82831	-2.28278	-132.857	-1.12701	-0.368169	-4.60517	-6.21461	-5.29832	-6.21461				-172.013	3.38514e-08	7.57258e-61
MT	32	mus 23S mt cat	0.001	0.004	0.006	0.043	8e-08	4e-06	0.033	0.13	0.005	0.005	0.003	2e-07			1	1.27339e-24	4.73108e-81	22	arb 23S mt cat			-6.90776	-5.52146	-5.116	-3.14656	-16.3412	-12.4292	-3.41125	-2.04022	-5.29832	-5.29832	-5.80914	-15.4249				-65.5103	0.00142864	2.5076e-18
MT	33	mus 23S mt gamma	0.006	6e-05	0.009	0.026	2e-54	1e-07	0.024	0.243	4e-05	0.001	0.001	0.005			1	9.21599e-69		23	arb 23S mt gamma			-5.116	-9.72117	-4.71053	-3.64966	-123.646	-16.1181	-3.7297	-1.41469	-10.1266	-6.90776	-6.90776	-5.29832				-185.141	9.10841e-09	2.90869e-66
	6	arb RY cat	6e-65	1e-05	0.0003	0.001	0.001	5e-69	7e-68	2e-82	0.607	0.081	4e-09	2e-31			2	0	0	24	arb reg mt cat			-147.876	-11.5129	-8.11173	-6.90776	-6.90776	-157.269	-154.63	-188.119	-0.499226	-2.51331	-19.337	-70.687				-684.347	1.90197e-30	5.69518e-278
	7	arb RY gamma	1e-37	3e-85	6e-47	4e-61	1e-05	1e-46	3e-70	4e-108	0.769	0.059	4e-05	0.0005			2	0		25	arb reg mt gamma			-85.1956	-194.621	-106.43	-139.071	-11.5129	-105.919	-160.082	-247.293	-0.262664	-2.83022	-10.1266	-7.6009				-1053.22	1.81689e-46	0
MT	26	arb RY mt cat	6e-49	3e-05	6e-54	3e-70	4e-32	3e-31	1e-05	1e-54	0.099	0.033	5e-07	0.0003			1	1.13543e-285	0	26	arb RY mt cat			-111.035	-10.4143	-122.548	-160.082	-72.2964	-70.2815	-11.5129	-124.34	-2.31264	-3.41125	-14.5087	-8.11173				-688.234	1.2894e-30	1.2287e-279
MT	27	arb RY mt gamma	3e-05	0.002	5e-37	5e-51	7e-06	4e-05	0.0001	2e-71	0.081	0.024	5e-06	0.0001			1	2.3697e-169		27	arb RY mt gamma			-10.4143	-6.21461	-83.5862	-115.822	-11.8696	-10.1266	-9.21034	-162.79	-2.51331	-3.7297	-12.2061	-9.21034				-416.278	8.34253e-19	1.72635e-163
	16	mus RY cat	4e-45	2e-124	0.001	9e-39	4e-47	2e-11	0.0002	3e-96	0.141	0.599	0.005	0.0003			2	0	0	28	arb RYMK mt cat			-102.23	-284.827	-6.90776	-87.6036	-106.835	-24.6353	-8.51719	-219.95	-1.959	-0.512494	-5.29832	-8.11173				-843.978	2.22086e-37	0
	17	mus RY gamma	6e-90	1e-05	5e-06	5e-89	2e-44	1e-41	0.0002	6e-87	0.116	0.763	0.0001	0.001			2	0		29	arb RYMK mt gamma			-205.441	-11.5129	-12.2061	-203.321	-100.621	-94.406	-8.51719	-198.533	-2.15417	-0.270497	-9.21034	-6.90776				-836.982	4.47022e-37	0
MT	36	mus RY mt cat	5e-63	8e-05	1e-61	3e-66	3e-53	9e-57	8e-55	2e-12	0.056	0.051	7e-74	5e-45			2	0	0	30	mus 16S mt cat			-143.453	-9.43348	-140.458	-150.872	-120.938	-129.05	-124.563	-26.9379	-2.8824	-2.97593	-168.445	-102.007				-851.564	1.04002e-37	0
MT	37	mus RY mt gamma	8e-39	0.0001	7e-06	5e-58	3e-32	3e-52	3e-82	8e-52	0.096	0.126	3e-39	2e-10			2	0		31	mus 16S mt gamma			-87.7214	-9.21034	-11.8696	-131.94	-72.5841	-118.636	-187.713	-117.655	-2.34341	-2.07147	-88.7022	-22.3327				-741.745	6.11541e-33	1.387e-302
	8	arb RYMK cat	0.188	0.018	0.005	5e-06	4e-75	5e-34	0.002	3e-06	0.064	0.032	0.469	0.036			3	1.63974e-111	6.85757e-160	32	mus 23S mt cat			-1.67131	-4.01738	-5.29832	-12.2061	-171.308	-76.6785	-6.21461	-12.7169	-2.74887	-3.44202	-0.757153	-3.32424				-296.302	1.35453e-13	1.04009e-112
	9	arb RYMK gamma	0.114	0.016	0.004	3e-05	0.003	9e-44	0.002	0.001	0.081	0.021	0.872	0.288			4	1.0228e-48		33	mus 23S mt gamma			-2.17156	-4.13517	-5.52146	-10.4143	-5.80914	-99.1165	-6.21461	-6.90776	-2.51331	-3.86323	-0.136966	-1.24479				-146.667	4.26904e-07	1.85282e-50
MT	28	arb RYMK mt cat	0.006	0.174	6e-07	8e-05	7e-07	3e-44	0.001	8e-06	0.004	0.0002	0.028	0.043			1	1.81201e-63	1.88796e-154	34	mus reg mt cat			-5.116	-1.7487	-14.3263	-9.43348	-14.1722	-100.215	-6.90776	-11.7361	-5.52146	-8.51719	-3.57555	-3.14656				-177.694	1.91794e-08	3.45205e-63
MT	29	arb RYMK mt gamma	0.009	0.308	0.007	3e-06	9e-07	4e-80	0.0003	3e-06	0.004	0.004	0.069	0.104			3	1.83972e-93		35	mus reg mt gamma			-4.71053	-1.17766	-4.96185	-12.7169	-13.9209	-182.821	-8.11173	-12.7169	-5.52146	-5.52146	-2.67365	-2.26336				-252.18	1.11678e-11	3.55652e-94
	18	mus RYMK cat	0.2	0.053	0.341	0.162	5e-06	1e-95	0.011	0.006	0.013	0.049	0.095	0.566			6	5.91351e-94	1.34163e-255	36	mus RY mt cat			-1.60944	-2.93746	-1.07587	-1.82016	-12.2061	-218.746	-4.50986	-5.116	-4.34281	-3.01593	-2.35388	-0.569161				-255.379	8.11004e-12	1.62425e-95
	19	mus RYMK gamma	0.228	0.135	0.452	0.189	1e-07	8e-165	0.014	0.005	0.071	0.024	0.212	0.875			7	8.05148e-161		37	mus RY mt gamma			-1.47841	-2.00248	-0.794073	-1.66601	-16.1181	-377.847	-4.2687	-5.29832	-2.64508	-3.7297	-1.55117	-0.133531				-415.848	8.70869e-19	2.62817e-163
MT	38	mus RYMK mt cat	0.02	0.056	0.04	0.24	6e-46	2e-46	7e-06	1e-05	0.039	0.025	0.11	0.206			4	1.54153e-92	8.58212e-270	38	mus RYMK mt cat			-3.91202	-2.8824	-3.21888	-1.42712	-104.127	-105.226	-11.8696	-11.5129	-3.24419	-3.68888	-2.20727	-1.57988				-251.109	1.24302e-11	9.98976e-94
MT	39	mus RYMK mt gamma	0.083	0.145	0.1	0.262	2e-46	2e-134	1e-07	0.0001	0.032	0.022	0.208	0.357			6	3.02399e-177		39	mus RYMK mt gamma			-2.48891	-1.93102	-2.30259	-1.33941	-105.226	-307.853	-16.1181	-9.21034	-3.44202	-3.81671	-1.57022	-1.03002				-453.728	1.97169e-20	2.03451e-179
	40	arb cat mtDel	0.036	0.572	0.015	0.03	1e-48	0.001	0.002	8e-73	0.002	0.008	0.007	0.007			1	1.1716e-120	6.03024e-152	40	arb cat mtDel			-3.32424	-0.558616	-4.19971	-3.50656	-110.524	-6.90776	-6.21461	-166.009	-6.21461	-4.82831	-4.96185	-4.96185				-312.288	2.73851e-14	1.90126e-119
	41	arb gamma mtDel	0.034	0.757	0.013	0.022	9e-05	3e-08	5e-05	6e-23	0.006	0.001	0.011	0.011			1	9.33392e-38		41	arb gamma mtDel			-3.38139	-0.278392	-4.34281	-3.81671	-9.3157	-17.3221	-9.90349	-51.1677	-5.116	-6.90776	-4.50986	-4.50986				-111.552	1.43007e-05	2.86603e-36
	42	mus cat mtDel	0.156	0.078	0.314	0.612	2e-06	7e-06	0.002	0.008	0.001	0.0004	0.004	0.026			4	6.75248e-17	1.39421e-53	42	mus cat mtDel			-1.8579	-2.55105	-1.15836	-0.491023	-13.1224	-11.8696	-6.21461	-4.82831	-6.90776	-7.82405	-5.52146	-3.64966				-56.825	0.00340503	4.22239e-15
	43	mus gamma mtDel	0.233	0.086	0.341	0.728	3e-10	3e-28	1e-05	0.001	0.001	0.0002	0.007	0.017			4	6.97028e-43		43	mus gamma mtDel			-1.45672	-2.45341	-1.07587	-0.317454	-21.9272	-63.3738	-11.5129	-6.90776	-6.90776	-8.51719	-4.96185	-4.07454				-124.45	3.93732e-06	1.90335e-41
			NOTES:
			The trees with "mt" are pruned trees inferred from mitochondria-including alignments, whereas the MtDel alignements were mitochondria-including alignments which were amputated of all mitochondria.
			the tree obtained by pruning the mitochondria from the arb with mitochondria tree (light green) is a bit more discordant than the other trees of the subgroup (full, 16S, 23S, RY or RYMK), which are significant to the respective alignment, the scores for the pruned mus with mitochondria are less discordant, but are smaller than the muscle without mitochondria. The RYMK and the full dataset behave …
			Furthermore, the deletion of mt from the alignment gives an alignment file that nearly rejects the trees of arb reg (0.062) and the trees of the former are rejected by the latter. Basically, the arb mt alignment has something weird with it.
		Fisher, but columnwise…	0	8.70434e-286	2.03379e-300	0	0	0	0	0	9.76271e-72	1.89468e-155	0	0
	#	reading	arb-16SRed_bacteria-gb.pv
	#	0	1+	2	9	10	|	3	4	5	6	7	8
	#	rank	item	obs	au	(se)	np	(se)	|	bp	(se)	pp	(se)	kh	(se)	sh	(se)	wkh	(se)	wsh	(se)	|
	#	1	1	3	0.6	-0.01	0.376	-0.002	|	0.373	-0.005	0.046	0	0.439	-0.005	0.948	-0.002	0.439	-0.005	0.934	-0.002	|
	#	2	2	-3	0.762	-0.008	0.458	-0.002	|	0.459	-0.005	0.954	0	0.561	-0.005	0.971	-0.002	0.561	-0.005	0.977	-0.001	|
	#	3	3	690.7	0.003	-0.004	5e-05	0	|	0	0	1e-300	0	0	0	0	0	0	0	0	0	|
	#	4	4	716.1	6e-05	-0.001	2e-07	0	|	0	0	9e-312	0	0	0	0	0	0	0	0	0	|
	#	5	5	444.8	1e-59	0	2e-19	0	|	0	0	7e-194	0	0	0	0	0	0	0	0	0	|
	#	6	6	461.8	8e-53	0	5e-18	0	|	0	0	3e-201	0	0	0	0	0	0	0	0	0	|
	#	7	7	480.4	0.001	-0.001	7e-05	0	|	0	0	2e-209	0	0	0	0	0	0	0	0	0	|
	#	8	8	453.4	1e-05	0	3e-06	0	|	0	0	1e-197	0	0	0	0	0	0	0	0	0	|
	#	9	9	471	4e-75	0	1e-21	0	|	0	0	3e-205	0	0	0	0	0	0	0	0	0	|
	#	10	10	474.8	0.003	-0.097	7e-08	0	|	0	0	6e-207	0	0	0	0	0	0	0	0	0	|
	#	11	11	48.9	0.141	-0.009	0.046	-0.001	|	0.045	-0.002	6e-22	0	0.092	-0.003	0.661	-0.005	0.092	-0.003	0.456	-0.005	|
	#	12	12	49.8	0.161	-0.009	0.074	-0.001	|	0.077	-0.003	2e-22	0	0.115	-0.003	0.691	-0.005	0.115	-0.003	0.543	-0.005	|
	#	13	13	727.8	0.0003	-0.001	6e-06	0	|	0	0	8e-317	0	0	0	0	0	0	0	0	0	|
	#	14	14	739.3	0.102	-0.359	4e-06	0	|	0	0	8e-322	0	0	0	0	0	0	0	0	0	|
	#	15	15	530.7	7e-47	0	7e-17	0	|	0	0	3e-231	0	0	0	0	0	0	0	0	0	|
	#	16	16	524.7	1e-37	0	4e-15	0	|	0	0	1e-228	0	0	0	0	0	0	0	0	0	|
	#	17	17	548.1	4e-47	0	3e-16	0	|	0	0	8e-239	0	0	0	0	0	0	0	0	0	|
	#	18	18	537.5	2e-44	0	4e-16	0	|	0	0	3e-234	0	0	0	0	0	0	0	0	0	|
	#	19	19	516.1	5e-06	0	2e-07	0	|	0	0	7e-225	0	0	0	0	0	0	0	0	0	|
	#	20	20	500.8	1e-07	0	2e-07	0	|	0	0	3e-218	0	0	0	0	0	0	0	0	0	|
	#	21	21	127.7	0.013	-0.003	0.003	0	|	0.003	-0.001	3e-56	0	0.008	-0.001	0.169	-0.004	0.007	-0.001	0.067	-0.003	|
	#	22	22	148.2	0.002	-0.001	0.001	0	|	0.001	0	4e-65	0	0.004	-0.001	0.099	-0.003	0.003	-0.001	0.032	-0.002	|
	#	23	23	796.9	4e-77	0	6e-22	0	|	0	0	0	0	0	0	0	0	0	0	0	0	|
	#	24	24	815.1	4e-05	0	4e-06	0	|	0	0	0	0	0	0	0	0	0	0	0	0	|
	#	25	25	442.9	5e-05	0	9e-06	0	|	0	0	4e-193	0	0	0	0	0	0	0	0	0	|
	#	26	26	420.3	7e-50	0	6e-18	0	|	0	0	3e-183	0	0	0	0	0	0	0	0	0	|
	#	27	27	511.6	4e-32	0	4e-14	0	|	0	0	6e-223	0	0	0	0	0	0	0	0	0	|
	#	28	28	523.9	7e-06	0	7e-06	0	|	0	0	3e-228	0	0	0	0	0	0	0	0	0	|
	#	29	29	448	7e-07	0	1e-07	0	|	0	0	3e-195	0	0	0	0	0	0	0	0	0	|
	#	30	30	448.2	9e-07	0	7e-07	0	|	0	0	2e-195	0	0	0	0	0	0	0	0	0	|
	#	31	31	63.6	0.135	-0.009	0.038	-0.001	|	0.037	-0.002	2e-28	0	0.079	-0.003	0.542	-0.005	0.079	-0.003	0.406	-0.005	|
	#	32	32	77.5	0.043	-0.007	0.006	0	|	0.005	-0.001	2e-34	0	0.045	-0.002	0.451	-0.005	0.045	-0.002	0.273	-0.004	|
	#	33	33	717.6	8e-08	0	1e-07	0	|	0	0	2e-312	0	0	0	0	0	0	0	0	0	|
	#	34	34	721.5	2e-54	0	6e-17	0	|	0	0	4e-314	0	0	0	0	0	0	0	0	0	|
	#	35	35	480.6	3e-05	-0.001	2e-07	0	|	0	0	2e-209	0	0	0	0	0	0	0	0	0	|
	#	36	36	456.9	8e-79	0	5e-22	0	|	0	0	3e-199	0	0	0	0	0	0	0	0	0	|
	#	37	37	574.1	3e-53	0	2e-17	0	|	0	0	5e-250	0	0	0	0	0	0	0	0	0	|
	#	38	38	555.5	3e-32	0	9e-14	0	|	0	0	5e-242	0	0	0	0	0	0	0	0	0	|
	#	39	39	431.2	6e-46	0	5e-16	0	|	0	0	5e-188	0	0	0	0	0	0	0	0	0	|
	#	40	40	444.5	2e-46	0	4e-17	0	|	0	0	8e-194	0	0	0	0	0	0	0	0	0	|
	#	41	41	433.8	1e-48	0	4e-17	0	|	0	0	4e-189	0	0	0	0	0	0	0	0	0	|
	#	42	42	455.7	9e-05	-0.001	5e-07	0	|	0	0	1e-198	0	0	0	0	0	0	0	0	0	|
	#	43	43	474	2e-06	0	3e-07	0	|	0	0	1e-206	0	0	0	0	0	0	0	0	0	|
	#	44	44	448.9	3e-10	0	1e-07	0	|	0	0	1e-195	0	0	0	0	0	0	0	0	0	|
	#	reading	arb-23S_bacteria-gb.pv
	#	0	1+	2	9	10	|	3	4	5	6	7	8
	#	rank	item	obs	au	(se)	np	(se)	|	bp	(se)	pp	(se)	kh	(se)	sh	(se)	wkh	(se)	wsh	(se)	|
	#	1	1	1653.1	7e-33	0	2e-14	0	|	0	0	0	0	0	0	0	0	0	0	0	0	|
	#	2	2	1867.8	7e-95	0	1e-25	0	|	0	0	0	0	0	0	0	0	0	0	0	0	|
	#	3	3	2.9	0.59	-0.01	0.344	-0.002	|	0.344	-0.005	0.053	0	0.43	-0.005	0.983	-0.001	0.43	-0.005	0.974	-0.002	|
	#	4	4	-2.9	0.76	-0.008	0.439	-0.002	|	0.443	-0.005	0.947	0	0.57	-0.005	0.988	-0.001	0.57	-0.005	0.991	-0.001	|
	#	5	5	158.3	0.002	-0.001	0.0003	0	|	0.0002	0	2e-69	0	0.001	0	0.189	-0.004	0.001	0	0.019	-0.001	|
	#	6	6	136.7	0.009	-0.004	0.001	0	|	0.001	0	4e-60	0	0.005	-0.001	0.28	-0.004	0.004	-0.001	0.069	-0.003	|
	#	7	7	521.4	7e-68	0	2e-20	0	|	0	0	4e-227	0	0	0	0	0	0	0	0	0	|
	#	8	8	669.7	3e-70	0	3e-20	0	|	0	0	1e-291	0	0	0	0	0	0	0	0	0	|
	#	9	9	185.3	0.002	-0.002	0.0002	0	|	0.0002	0	3e-81	0	0.001	0	0.107	-0.003	0.001	0	0.019	-0.001	|
	#	10	10	199.2	0.002	-0.002	0.0002	0	|	0.0002	0	3e-87	0	0.001	0	0.086	-0.003	0.001	0	0.017	-0.001	|
	#	11	11	1535.4	2e-47	0	2e-17	0	|	0	0	0	0	0	0	0	0	0	0	0	0	|
	#	12	12	1338.2	3e-07	0	2e-06	0	|	0	0	0	0	0	0	0	0	0	0	0	0	|
	#	13	13	29.5	0.197	-0.011	0.049	-0.001	|	0.049	-0.002	1e-13	0	0.151	-0.004	0.886	-0.003	0.151	-0.004	0.743	-0.004	|
	#	14	14	23	0.324	-0.011	0.14	-0.001	|	0.139	-0.003	1e-10	0	0.217	-0.004	0.909	-0.003	0.217	-0.004	0.818	-0.004	|
	#	15	15	100.5	0.004	-0.003	0.0003	0	|	0.0005	0	2e-44	0	0.003	-0.001	0.496	-0.005	0.003	-0.001	0.045	-0.002	|
	#	16	16	86.2	0.014	-0.005	0.001	0	|	0.001	0	3e-38	0	0.01	-0.001	0.591	-0.005	0.008	-0.001	0.102	-0.003	|
	#	17	17	502.4	0.0002	-0.001	8e-06	0	|	0	0	6e-219	0	0	0	0	0	0	0	0	0	|
	#	18	18	494.1	0.0002	-0.001	2e-05	0	|	0	0	2e-215	0	0	0	0	0	0	0	0	0	|
	#	19	19	135.3	0.011	-0.004	0.002	0	|	0.002	0	2e-59	0	0.007	-0.001	0.285	-0.005	0.007	-0.001	0.09	-0.003	|
	#	20	20	157.5	0.014	-0.006	0.001	0	|	0.0003	0	4e-69	0	0.003	-0.001	0.185	-0.004	0.003	-0.001	0.05	-0.002	|
	#	21	21	1867.8	3e-07	0	4e-06	0	|	0	0	0	0	0	0	0	0	0	0	0	0	|
	#	22	22	1800.1	2e-08	0	3e-06	0	|	0	0	0	0	0	0	0	0	0	0	0	0	|
	#	23	23	142.4	0.031	-0.006	0.005	0	|	0.005	-0.001	1e-62	0	0.012	-0.001	0.278	-0.004	0.011	-0.001	0.13	-0.003	|
	#	24	24	138.5	0.03	-0.006	0.006	0	|	0.006	-0.001	7e-61	0	0.014	-0.001	0.298	-0.005	0.012	-0.001	0.137	-0.003	|
	#	25	25	262.1	0.004	-0.006	4e-05	0	|	0	0	1e-114	0	0	0	0.017	-0.001	0	0	0.001	0	|
	#	26	26	268.5	0.001	-0.002	5e-05	0	|	0	0	2e-117	0	0	0	0.012	-0.001	0	0	0.0003	0	|
	#	27	27	662.7	1e-05	0	7e-06	0	|	0	0	2e-288	0	0	0	0	0	0	0	0	0	|
	#	28	28	718.2	0.0001	-0.001	3e-06	0	|	0	0	1e-312	0	0	0	0	0	0	0	0	0	|
	#	29	29	324.2	0.001	-0.001	4e-05	0	|	0	0	1e-141	0	0	0	0.003	-0.001	0	0	0	0	|
	#	30	30	310	0.0003	-0.001	4e-05	0	|	0	0	2e-135	0	0	0	0.005	-0.001	0	0	0	0	|
	#	31	31	1589.6	3e-120	0	2e-28	0	|	0	0	0	0	0	0	0	0	0	0	0	0	|
	#	32	32	1572.6	1e-11	0	3e-08	0	|	0	0	0	0	0	0	0	0	0	0	0	0	|
	#	33	33	67.2	0.033	-0.006	0.006	0	|	0.004	-0.001	6e-30	0	0.015	-0.001	0.686	-0.005	0.015	-0.001	0.186	-0.004	|
	#	34	34	61.8	0.024	-0.005	0.005	0	|	0.004	-0.001	1e-27	0	0.017	-0.001	0.712	-0.005	0.017	-0.001	0.19	-0.004	|
	#	35	35	178.7	0.001	-0.002	8e-05	0	|	4e-05	0	2e-78	0	0.0001	0	0.136	-0.003	7e-05	0	0.001	0	|
	#	36	36	231.5	0.001	-0.001	0.0001	0	|	0	0	3e-101	0	0	0	0.031	-0.002	0	0	0.0003	0	|
	#	37	37	589.4	8e-55	0	2e-17	0	|	0	0	1e-256	0	0	0	0	0	0	0	0	0	|
	#	38	38	577.5	3e-82	0	1e-22	0	|	0	0	2e-251	0	0	0	0	0	0	0	0	0	|
	#	39	39	292	7e-06	0	2e-06	0	|	0	0	1e-127	0	0	0	0.007	-0.001	0	0	0	0	|
	#	40	40	252.1	1e-07	0	1e-06	0	|	0	0	3e-110	0	0	0	0.023	-0.001	1e-07	0	0.0003	0	|
	#	41	41	277.1	0.002	-0.006	2e-05	0	|	0	0	4e-121	0	0	0	0.01	-0.001	0	0	0.0001	0	|
	#	42	42	276.9	5e-05	0	4e-06	0	|	0	0	5e-121	0	0	0	0.01	-0.001	0	0	0.001	0	|
	#	43	43	173.5	0.002	-0.004	4e-05	0	|	0	0	4e-76	0	0.0001	0	0.154	-0.004	0	0	0.001	0	|
	#	44	44	187.4	1e-05	0	2e-06	0	|	0	0	4e-82	0	0.0001	0	0.115	-0.003	0	0	0.0001	0	|
	#	reading	arb-bij_bacteria-RYKM.pv
	#	0	1+	2	9	10	|	3	4	5	6	7	8
	#	rank	item	obs	au	(se)	np	(se)	|	bp	(se)	pp	(se)	kh	(se)	sh	(se)	wkh	(se)	wsh	(se)	|
	#	1	1	885.1	2e-87	0	6e-22	0	|	0	0	0	0	0	0	0	0	0	0	0	0	|
	#	2	2	1058	8e-53	0	2e-16	0	|	0	0	0	0	0	0	0	0	0	0	0	0	|
	#	3	3	141.4	0.0001	0	4e-05	0	|	0.0001	0	4e-62	0	0.001	0	0.15	-0.004	0.001	0	0.018	-0.001	|
	#	4	4	150.9	0.0002	-0.001	3e-05	0	|	0	0	3e-66	0	0.0003	0	0.123	-0.003	0.0003	0	0.01	-0.001	|
	#	5	5	48.5	0.079	-0.009	0.013	0	|	0.012	-0.001	8e-22	0	0.057	-0.002	0.783	-0.004	0.057	-0.002	0.511	-0.005	|
	#	6	6	52.5	0.108	-0.014	0.008	0	|	0.008	-0.001	2e-23	0	0.055	-0.002	0.75	-0.004	0.055	-0.002	0.532	-0.005	|
	#	7	7	175	4e-09	0	4e-07	0	|	0	0	1e-76	0	9e-05	0	0.065	-0.002	9e-05	0	0.0001	0	|
	#	8	8	236.3	4e-05	0	4e-06	0	|	0	0	2e-103	0	0	0	0.01	-0.001	0	0	0	0	|
	#	9	9	15.1	0.469	-0.011	0.191	-0.001	|	0.189	-0.004	3e-07	0	0.253	-0.004	0.966	-0.002	0.253	-0.004	0.917	-0.003	|
	#	10	10	-15.1	0.872	-0.005	0.659	-0.002	|	0.666	-0.005	1	0	0.747	-0.004	0.998	0	0.747	-0.004	1	0	|
	#	11	11	779.8	1e-115	0	5e-28	0	|	0	0	0	0	0	0	0	0	0	0	0	0	|
	#	12	12	677.7	1e-71	0	4e-20	0	|	0	0	5e-295	0	0	0	0	0	0	0	0	0	|
	#	13	13	173.3	0.005	-0.006	0.0001	0	|	0	0	6e-76	0	0.0003	0	0.071	-0.003	0.0002	0	0.004	-0.001	|
	#	14	14	158.9	0.005	-0.004	0.0002	0	|	0.0003	0	1e-69	0	0.001	0	0.109	-0.003	0.001	0	0.012	-0.001	|
	#	15	15	108.2	0.007	-0.008	0.0001	0	|	7e-05	0	1e-47	0	0.006	-0.001	0.288	-0.005	0.004	-0.001	0.073	-0.003	|
	#	16	16	93.5	0.016	-0.005	0.002	0	|	0.002	0	2e-41	0	0.014	-0.001	0.386	-0.005	0.012	-0.001	0.168	-0.004	|
	#	17	17	211.2	0.005	-0.013	1e-05	0	|	0	0	2e-92	0	0	0	0.019	-0.001	0	0	9e-05	0	|
	#	18	18	223.8	0.0001	-0.001	3e-06	0	|	0	0	6e-98	0	0	0	0.013	-0.001	0	0	0	0	|
	#	19	19	48	0.095	-0.011	0.012	0	|	0.013	-0.001	1e-21	0	0.068	-0.003	0.787	-0.004	0.068	-0.003	0.585	-0.005	|
	#	20	20	41.5	0.212	-0.014	0.028	-0.001	|	0.029	-0.002	1e-18	0	0.097	-0.003	0.841	-0.004	0.097	-0.003	0.724	-0.004	|
	#	21	21	1092.9	6e-62	0	2e-19	0	|	0	0	0	0	0	0	0	0	0	0	0	0	|
	#	22	22	1056	1e-86	0	2e-23	0	|	0	0	0	0	0	0	0	0	0	0	0	0	|
	#	23	23	278.4	1e-06	0	6e-07	0	|	0	0	1e-121	0	0	0	0.004	-0.001	0	0	0	0	|
	#	24	24	289.3	2e-46	0	4e-17	0	|	0	0	2e-126	0	0	0	0.003	-0.001	0	0	0	0	|
	#	25	25	96.6	0.02	-0.011	0.0004	0	|	0.0004	0	1e-42	0	0.007	-0.001	0.373	-0.005	0.007	-0.001	0.124	-0.003	|
	#	26	26	87.1	0.007	-0.004	0.001	0	|	0.0004	0	2e-38	0	0.011	-0.001	0.451	-0.005	0.011	-0.001	0.174	-0.004	|
	#	27	27	266.3	5e-07	0	1e-06	0	|	0	0	2e-116	0	0	0	0.004	-0.001	0	0	0	0	|
	#	28	28	355.2	5e-06	0	2e-06	0	|	0	0	6e-155	0	0	0	0.0001	0	0	0	0	0	|
	#	29	29	69.8	0.028	-0.006	0.003	0	|	0.003	-0.001	5e-31	0	0.017	-0.001	0.594	-0.005	0.017	-0.001	0.201	-0.004	|
	#	30	30	59.6	0.069	-0.008	0.012	0	|	0.012	-0.001	1e-26	0	0.029	-0.002	0.688	-0.005	0.029	-0.002	0.306	-0.005	|
	#	31	31	832.4	6e-10	0	1e-07	0	|	0	0	0	0	0	0	0	0	0	0	0	0	|
	#	32	32	823.1	1e-12	0	1e-08	0	|	0	0	0	0	0	0	0	0	0	0	0	0	|
	#	33	33	209.8	0.003	-0.003	0.0001	0	|	0	0	7e-92	0	0	0	0.03	-0.002	0	0	0.001	0	|
	#	34	34	187.9	0.001	-0.002	2e-05	0	|	0	0	2e-82	0	0.0001	0	0.055	-0.002	0.0001	0	0.003	-0.001	|
	#	35	35	128.5	0.005	-0.006	0.0001	0	|	0	0	2e-56	0	0.003	-0.001	0.182	-0.004	0.003	-0.001	0.055	-0.002	|
	#	36	36	123.6	0.0004	-0.001	6e-05	0	|	4e-05	0	2e-54	0	0.002	0	0.196	-0.004	0.002	0	0.044	-0.002	|
	#	37	37	278.6	7e-74	0	5e-21	0	|	0	0	1e-121	0	0	0	0.002	0	0	0	0	0	|
	#	38	38	259.8	3e-39	0	5e-15	0	|	0	0	1e-113	0	0	0	0.004	-0.001	0	0	0	0	|
	#	39	39	61.6	0.11	-0.012	0.012	0	|	0.012	-0.001	2e-27	0	0.049	-0.002	0.678	-0.005	0.049	-0.002	0.476	-0.005	|
	#	40	40	51.3	0.208	-0.011	0.055	-0.001	|	0.052	-0.002	5e-23	0	0.102	-0.003	0.758	-0.004	0.102	-0.003	0.669	-0.005	|
	#	41	41	104.7	0.007	-0.006	0.0002	0	|	0.0003	0	4e-46	0	0.005	-0.001	0.314	-0.005	0.005	-0.001	0.069	-0.003	|
	#	42	42	101.3	0.011	-0.005	0.001	0	|	0.0002	0	1e-44	0	0.007	-0.001	0.338	-0.005	0.006	-0.001	0.095	-0.003	|
	#	43	43	134	0.004	-0.005	8e-05	0	|	0	0	6e-59	0	0.003	-0.001	0.163	-0.004	0.003	-0.001	0.052	-0.002	|
	#	44	44	121.6	0.007	-0.004	0.001	0	|	0.001	0	2e-53	0	0.007	-0.001	0.219	-0.004	0.007	-0.001	0.095	-0.003	|
	#	reading	arb-bij_bacteria-gb-RY.pv
	#	0	1+	2	9	10	|	3	4	5	6	7	8
	#	rank	item	obs	au	(se)	np	(se)	|	bp	(se)	pp	(se)	kh	(se)	sh	(se)	wkh	(se)	wsh	(se)	|
	#	1	1	392.3	2e-05	0	6e-06	0	|	0	0	4e-171	0	0	0	0	0	0	0	0	0	|
	#	2	2	462.2	6e-58	0	5e-19	0	|	0	0	2e-201	0	0	0	0	0	0	0	0	0	|
	#	3	3	123.4	0.011	-0.01	0.0001	0	|	7e-05	0	2e-54	0	0.002	0	0.032	-0.002	0.001	0	0.013	-0.001	|
	#	4	4	120.8	0.008	-0.004	0.001	0	|	0	0	4e-53	0	0.003	-0.001	0.04	-0.002	0.001	0	0.016	-0.001	|
	#	5	5	81.1	0.003	-0.004	9e-05	0	|	8e-05	0	6e-36	0	0.013	-0.001	0.155	-0.004	0.004	-0.001	0.067	-0.002	|
	#	6	6	93.3	0.001	-0.004	7e-06	0	|	0	0	3e-41	0	0.008	-0.001	0.095	-0.003	0.002	0	0.034	-0.002	|
	#	7	7	6.4	0.607	-0.01	0.339	-0.002	|	0.342	-0.005	0.002	0	0.398	-0.005	0.945	-0.002	0.398	-0.005	0.934	-0.002	|
	#	8	8	-6.4	0.769	-0.007	0.543	-0.002	|	0.548	-0.005	0.998	0	0.602	-0.005	0.97	-0.002	0.602	-0.005	0.975	-0.002	|
	#	9	9	54.8	0.064	-0.009	0.008	0	|	0.007	-0.001	2e-24	0	0.055	-0.002	0.429	-0.005	0.03	-0.002	0.315	-0.005	|
	#	10	10	43.9	0.081	-0.01	0.01	0	|	0.01	-0.001	8e-20	0	0.068	-0.003	0.585	-0.005	0.044	-0.002	0.391	-0.005	|
	#	11	11	314.6	0.0003	-0.001	1e-05	0	|	0	0	2e-137	0	0	0	0	0	0	0	0	0	|
	#	12	12	308	4e-05	0	1e-05	0	|	0	0	2e-134	0	0	0	0	0	0	0	0	0	|
	#	13	13	130.3	0.007	-0.005	0.0002	0	|	0	0	3e-57	0	0.002	0	0.026	-0.002	4e-05	0	0.007	-0.001	|
	#	14	14	124.9	0.01	-0.007	0.0004	0	|	3e-05	0	6e-55	0	0.003	-0.001	0.036	-0.002	0.0002	0	0.013	-0.001	|
	#	15	15	122	0.013	-0.022	3e-05	0	|	0	0	1e-53	0	0.003	-0.001	0.024	-0.002	0.0002	0	0.009	-0.001	|
	#	16	16	118.2	0.004	-0.007	5e-05	0	|	0	0	5e-52	0	0.003	-0.001	0.031	-0.002	0.0002	0	0.01	-0.001	|
	#	17	17	40.7	0.141	-0.011	0.025	-0.001	|	0.025	-0.002	2e-18	0	0.087	-0.003	0.62	-0.005	0.087	-0.003	0.531	-0.005	|
	#	18	18	48.6	0.116	-0.01	0.025	-0.001	|	0.026	-0.002	8e-22	0	0.082	-0.003	0.513	-0.005	0.082	-0.003	0.507	-0.005	|
	#	19	19	88.8	0.013	-0.012	0.0001	0	|	7e-05	0	3e-39	0	0.009	-0.001	0.119	-0.003	0.002	0	0.038	-0.002	|
	#	20	20	91	0.071	-0.029	0.001	0	|	5e-05	0	3e-40	0	0.009	-0.001	0.107	-0.003	0.003	-0.001	0.058	-0.002	|
	#	21	21	543.1	1e-34	0	6e-14	0	|	0	0	1e-236	0	0	0	0	0	0	0	0	0	|
	#	22	22	552.6	3e-05	0	6e-06	0	|	0	0	1e-240	0	0	0	0	0	0	0	0	0	|
	#	23	23	165.5	0.001	-0.002	1e-05	0	|	0	0	1e-72	0	5e-05	0	0.007	-0.001	0	0	0.0001	0	|
	#	24	24	164.7	0.0001	-0.001	2e-06	0	|	0	0	3e-72	0	0	0	0.007	-0.001	0	0	0.0002	0	|
	#	25	25	102.5	0.006	-0.007	8e-05	0	|	2e-05	0	3e-45	0	0.006	-0.001	0.065	-0.002	0.002	0	0.04	-0.002	|
	#	26	26	102.7	1e-05	0	2e-06	0	|	0	0	2e-45	0	0.006	-0.001	0.063	-0.002	0.002	0	0.042	-0.002	|
	#	27	27	36.4	0.099	-0.01	0.015	0	|	0.014	-0.001	2e-16	0	0.047	-0.002	0.649	-0.005	0.047	-0.002	0.339	-0.005	|
	#	28	28	42.7	0.081	-0.009	0.014	0	|	0.014	-0.001	3e-19	0	0.041	-0.002	0.577	-0.005	0.041	-0.002	0.282	-0.005	|
	#	29	29	75.1	0.004	-0.004	0.0001	0	|	5e-05	0	2e-33	0	0.012	-0.001	0.205	-0.004	0.004	-0.001	0.075	-0.003	|
	#	30	30	75.5	0.004	-0.004	0.0002	0	|	0	0	2e-33	0	0.013	-0.001	0.202	-0.004	0.004	-0.001	0.066	-0.002	|
	#	31	31	321	4e-57	0	5e-19	0	|	0	0	4e-140	0	0	0	0	0	0	0	0	0	|
	#	32	32	317.5	0.0002	-0.001	7e-06	0	|	0	0	1e-138	0	0	0	0	0	0	0	0	0	|
	#	33	33	132.8	0.005	-0.009	3e-05	0	|	0	0	2e-58	0	0.001	0	0.025	-0.002	0	0	0.006	-0.001	|
	#	34	34	132.2	4e-05	0	5e-06	0	|	0	0	4e-58	0	0.001	0	0.025	-0.002	0.0002	0	0.009	-0.001	|
	#	35	35	125.9	0.0002	-0.001	1e-05	0	|	0	0	2e-55	0	0.002	0	0.02	-0.001	0.0004	0	0.012	-0.001	|
	#	36	36	134	0.002	-0.006	2e-05	0	|	0	0	7e-59	0	0.001	0	0.009	-0.001	0.0001	0	0.005	-0.001	|
	#	37	37	62.2	0.056	-0.012	0.003	0	|	0.003	-0.001	9e-28	0	0.028	-0.002	0.357	-0.005	0.028	-0.002	0.257	-0.004	|
	#	38	38	56.5	0.096	-0.012	0.01	0	|	0.008	-0.001	3e-25	0	0.042	-0.002	0.416	-0.005	0.042	-0.002	0.325	-0.005	|
	#	39	39	70.9	0.039	-0.009	0.003	0	|	0.002	0	2e-31	0	0.025	-0.002	0.249	-0.004	0.018	-0.001	0.232	-0.004	|
	#	40	40	81.5	0.032	-0.01	0.001	0	|	0.001	0	4e-36	0	0.02	-0.001	0.166	-0.004	0.016	-0.001	0.205	-0.004	|
	#	41	41	99.3	0.002	-0.002	9e-05	0	|	3e-05	0	8e-44	0	0.005	-0.001	0.077	-0.003	0.002	0	0.03	-0.002	|
	#	42	42	92.4	0.006	-0.006	0.0002	0	|	0.0002	0	7e-41	0	0.009	-0.001	0.104	-0.003	0.003	-0.001	0.054	-0.002	|
	#	43	43	131	0.001	-0.004	2e-06	0	|	0	0	1e-57	0	0.001	0	0.015	-0.001	0.0003	0	0.01	-0.001	|
	#	44	44	126.3	0.001	-0.004	6e-06	0	|	0	0	1e-55	0	0.002	0	0.02	-0.001	0.0003	0	0.013	-0.001	|
	#	reading	arb-bij_bacteria-gb.pv
	#	0	1+	2	9	10	|	3	4	5	6	7	8
	#	rank	item	obs	au	(se)	np	(se)	|	bp	(se)	pp	(se)	kh	(se)	sh	(se)	wkh	(se)	wsh	(se)	|
	#	1	1	1112.1	0.003	-0.028	7e-07	0	|	0	0	0	0	0	0	0	0	0	0	0	0	|
	#	2	2	1320.6	2e-05	0	8e-07	0	|	0	0	0	0	0	0	0	0	0	0	0	0	|
	#	3	3	80.4	0.134	-0.012	0.019	0	|	0.016	-0.001	1e-35	0	0.088	-0.003	0.676	-0.005	0.074	-0.003	0.534	-0.005	|
	#	4	4	104.2	0.028	-0.007	0.003	0	|	0.002	0	5e-46	0	0.049	-0.002	0.559	-0.005	0.033	-0.002	0.311	-0.005	|
	#	5	5	2	0.706	-0.009	0.289	-0.001	|	0.282	-0.005	0.114	0	0.47	-0.005	0.99	-0.001	0.47	-0.005	0.988	-0.001	|
	#	6	6	-2	0.763	-0.008	0.312	-0.002	|	0.308	-0.005	0.886	0	0.53	-0.005	0.994	-0.001	0.53	-0.005	0.994	-0.001	|
	#	7	7	391.2	6e-65	0	6e-20	0	|	0	0	1e-170	0	0	0	0.003	-0.001	0	0	0	0	|
	#	8	8	513	1e-37	0	3e-15	0	|	0	0	1e-223	0	0	0	0.0001	0	0	0	0	0	|
	#	9	9	48.9	0.188	-0.012	0.033	-0.001	|	0.035	-0.002	5e-22	0	0.117	-0.003	0.891	-0.003	0.107	-0.003	0.674	-0.005	|
	#	10	10	77.7	0.114	-0.011	0.017	0	|	0.017	-0.001	2e-34	0	0.07	-0.003	0.757	-0.004	0.053	-0.002	0.461	-0.005	|
	#	11	11	1023.4	3e-51	0	9e-17	0	|	0	0	0	0	0	0	0	0	0	0	0	0	|
	#	12	12	840.2	4e-68	0	1e-21	0	|	0	0	0	0	0	0	0	0	0	0	0	0	|
	#	13	13	156.9	0.005	-0.008	5e-05	0	|	0	0	7e-69	0	0.007	-0.001	0.333	-0.005	0.001	0	0.021	-0.001	|
	#	14	14	154.2	0.003	-0.003	0.0002	0	|	0.0002	0	1e-67	0	0.009	-0.001	0.345	-0.005	0.004	-0.001	0.04	-0.002	|
	#	15	15	39.6	0.248	-0.014	0.041	-0.001	|	0.041	-0.002	5e-18	0	0.205	-0.004	0.911	-0.003	0.205	-0.004	0.858	-0.003	|
	#	16	16	18.7	0.572	-0.011	0.172	-0.001	|	0.176	-0.004	6e-09	0	0.341	-0.005	0.965	-0.002	0.341	-0.005	0.953	-0.002	|
	#	17	17	434	4e-45	0	1e-16	0	|	0	0	3e-189	0	0	0	0.001	0	0	0	0	0	|
	#	18	18	419.7	6e-90	0	3e-25	0	|	0	0	4e-183	0	0	0	0.001	0	0	0	0	0	|
	#	19	19	50.2	0.2	-0.015	0.022	-0.001	|	0.023	-0.001	1e-22	0	0.078	-0.003	0.889	-0.003	0.078	-0.003	0.603	-0.005	|
	#	20	20	48.2	0.228	-0.016	0.023	-0.001	|	0.022	-0.001	1e-21	0	0.082	-0.003	0.899	-0.003	0.082	-0.003	0.634	-0.005	|
	#	21	21	1431.7	8e-05	0	5e-06	0	|	0	0	0	0	0	0	0	0	0	0	0	0	|
	#	22	22	1384.4	2e-53	0	2e-17	0	|	0	0	0	0	0	0	0	0	0	0	0	0	|
	#	23	23	322.5	1e-08	0	2e-07	0	|	0	0	8e-141	0	0	0	0.03	-0.002	0	0	0	0	|
	#	24	24	328.5	8e-59	0	2e-18	0	|	0	0	2e-143	0	0	0	0.028	-0.002	0	0	0	0	|
	#	25	25	112.3	0.077	-0.016	0.003	0	|	0.003	-0.001	1e-49	0	0.023	-0.002	0.559	-0.005	0.023	-0.002	0.289	-0.005	|
	#	26	26	96.7	0.096	-0.012	0.009	0	|	0.009	-0.001	9e-43	0	0.039	-0.002	0.662	-0.005	0.039	-0.002	0.418	-0.005	|
	#	27	27	553.3	6e-49	0	1e-16	0	|	0	0	4e-241	0	0	0	6e-05	0	0	0	0	0	|
	#	28	28	621.1	3e-05	0	9e-07	0	|	0	0	2e-270	0	0	0	0	0	0	0	0	0	|
	#	29	29	180.7	0.006	-0.005	0.0002	0	|	0	0	3e-79	0	0.002	0	0.216	-0.004	0.003	-0.001	0.031	-0.002	|
	#	30	30	166.9	0.009	-0.007	0.0002	0	|	0.0004	0	3e-73	0	0.003	-0.001	0.273	-0.004	0.004	-0.001	0.058	-0.002	|
	#	31	31	1101.1	5e-35	0	2e-14	0	|	0	0	0	0	0	0	0	0	0	0	0	0	|
	#	32	32	1092.9	1e-09	0	6e-08	0	|	0	0	0	0	0	0	0	0	0	0	0	0	|
	#	33	33	184.5	0.001	-0.001	5e-05	0	|	0	0	6e-81	0	0.003	-0.001	0.239	-0.004	0.001	0	0.019	-0.001	|
	#	34	34	184.1	0.006	-0.008	6e-05	0	|	0	0	1e-80	0	0.004	-0.001	0.24	-0.004	0.002	0	0.024	-0.002	|
	#	35	35	77	0.135	-0.016	0.009	0	|	0.01	-0.001	3e-34	0	0.092	-0.003	0.746	-0.004	0.092	-0.003	0.631	-0.005	|
	#	36	36	102.8	0.067	-0.013	0.004	0	|	0.004	-0.001	2e-45	0	0.027	-0.002	0.622	-0.005	0.027	-0.002	0.306	-0.005	|
	#	37	37	543.3	5e-63	0	4e-19	0	|	0	0	1e-236	0	0	0	0.0001	0	0	0	0	0	|
	#	38	38	525.8	8e-39	0	1e-14	0	|	0	0	4e-229	0	0	0	0.0001	0	0	0	0	0	|
	#	39	39	125.2	0.02	-0.007	0.001	0	|	0.001	0	4e-55	0	0.013	-0.001	0.475	-0.005	0.013	-0.001	0.19	-0.004	|
	#	40	40	100.8	0.083	-0.012	0.007	0	|	0.006	-0.001	2e-44	0	0.029	-0.002	0.632	-0.005	0.029	-0.002	0.324	-0.005	|
	#	41	41	122	0.036	-0.009	0.002	0	|	0.002	0	1e-53	0	0.017	-0.001	0.507	-0.005	0.017	-0.001	0.216	-0.004	|
	#	42	42	130.3	0.034	-0.011	0.001	0	|	0.001	0	2e-57	0	0.012	-0.001	0.464	-0.005	0.012	-0.001	0.17	-0.004	|
	#	43	43	72.6	0.156	-0.018	0.009	0	|	0.009	-0.001	3e-32	0	0.11	-0.003	0.769	-0.004	0.11	-0.003	0.699	-0.005	|
	#	44	44	65.7	0.233	-0.015	0.029	-0.001	|	0.03	-0.002	3e-29	0	0.134	-0.003	0.805	-0.004	0.134	-0.003	0.742	-0.004	|
	#	reading	arb-bij_bacteria_mtDel.pv
	#	0	1+	2	9	10	|	3	4	5	6	7	8
	#	rank	item	obs	au	(se)	np	(se)	|	bp	(se)	pp	(se)	kh	(se)	sh	(se)	wkh	(se)	wsh	(se)	|
	#	1	1	1014.3	0.007	-0.029	5e-06	0	|	0	0	0	0	0	0	0	0	0	0	0	0	|
	#	2	2	1188.2	0.001	-0.005	1e-06	0	|	0	0	0	0	0	0	0	0	0	0	0	0	|
	#	3	3	195.9	0.005	-0.006	0.0001	0	|	0	0	8e-86	0	0.003	-0.001	0.155	-0.004	0.003	-0.001	0.057	-0.002	|
	#	4	4	219.9	3e-05	0	1e-06	0	|	0	0	3e-96	0	0.002	0	0.107	-0.003	0.001	0	0.027	-0.002	|
	#	5	5	105.6	0.062	-0.015	0.002	0	|	0.003	-0.001	1e-46	0	0.024	-0.002	0.529	-0.005	0.024	-0.002	0.283	-0.005	|
	#	6	6	104.4	0.069	-0.015	0.003	0	|	0.002	0	5e-46	0	0.023	-0.001	0.535	-0.005	0.023	-0.001	0.286	-0.005	|
	#	7	7	388.7	1e-05	0	4e-07	0	|	0	0	1e-169	0	0	0	0.001	0	0	0	0	0	|
	#	8	8	471	3e-85	0	2e-23	0	|	0	0	3e-205	0	0	0	6e-06	0	0	0	0	0	|
	#	9	9	121.3	0.018	-0.007	0.001	0	|	0.001	0	2e-53	0	0.009	-0.001	0.441	-0.005	0.009	-0.001	0.147	-0.004	|
	#	10	10	118.5	0.016	-0.005	0.002	0	|	0.002	0	3e-52	0	0.025	-0.002	0.449	-0.005	0.022	-0.001	0.26	-0.004	|
	#	11	11	908.4	0.001	-0.001	4e-05	0	|	0	0	0	0	0	0	0	0	0	0	0	0	|
	#	12	12	757.2	0.0002	-0.001	1e-06	0	|	0	0	0	0	0	0	0	0	0	0	0	0	|
	#	13	13	220.1	0.002	-0.003	3e-05	0	|	0	0	2e-96	0	0.001	0	0.102	-0.003	0.001	0	0.029	-0.002	|
	#	14	14	242.7	9e-05	0	6e-06	0	|	0	0	4e-106	0	0.001	0	0.075	-0.003	0.001	0	0.015	-0.001	|
	#	15	15	122.2	0.069	-0.014	0.003	0	|	0.003	-0.001	8e-54	0	0.032	-0.002	0.423	-0.005	0.032	-0.002	0.336	-0.005	|
	#	16	16	113.5	0.1	-0.013	0.009	0	|	0.009	-0.001	5e-50	0	0.036	-0.002	0.476	-0.005	0.036	-0.002	0.365	-0.005	|
	#	17	17	364.3	2e-124	0	1e-28	0	|	0	0	6e-159	0	0	0	0.003	-0.001	0	0	0	0	|
	#	18	18	327.3	1e-05	0	6e-06	0	|	0	0	7e-143	0	0	0	0.006	-0.001	0	0	0	0	|
	#	19	19	97.8	0.053	-0.014	0.002	0	|	0.002	0	3e-43	0	0.02	-0.001	0.581	-0.005	0.02	-0.001	0.253	-0.004	|
	#	20	20	76.7	0.135	-0.015	0.01	0	|	0.01	-0.001	5e-34	0	0.051	-0.002	0.714	-0.005	0.051	-0.002	0.485	-0.005	|
	#	21	21	1184.9	1e-48	0	7e-17	0	|	0	0	0	0	0	0	0	0	0	0	0	0	|
	#	22	22	1100.9	3e-67	0	2e-19	0	|	0	0	0	0	0	0	0	0	0	0	0	0	|
	#	23	23	231	2e-06	0	6e-06	0	|	0	0	5e-101	0	0.0003	0	0.105	-0.003	0.0001	0	0.006	-0.001	|
	#	24	24	237.6	0.001	-0.001	6e-05	0	|	0.0002	0	6e-104	0	0.0001	0	0.097	-0.003	6e-05	0	0.004	-0.001	|
	#	25	25	11.5	0.502	-0.013	0.122	-0.001	|	0.121	-0.003	1e-05	0	0.356	-0.005	0.979	-0.001	0.356	-0.005	0.963	-0.002	|
	#	26	26	13.5	0.528	-0.012	0.133	-0.001	|	0.132	-0.003	1e-06	0	0.343	-0.005	0.982	-0.001	0.343	-0.005	0.968	-0.002	|
	#	27	27	421.2	3e-05	0	2e-06	0	|	0	0	1e-183	0	0	0	0.001	0	0	0	0	0	|
	#	28	28	476.9	0.002	-0.005	2e-05	0	|	0	0	7e-208	0	0	0	7e-05	0	0	0	0	0	|
	#	29	29	53.7	0.174	-0.013	0.025	-0.001	|	0.024	-0.002	5e-24	0	0.134	-0.003	0.856	-0.004	0.133	-0.003	0.747	-0.004	|
	#	30	30	44.4	0.308	-0.013	0.065	-0.001	|	0.069	-0.003	5e-20	0	0.177	-0.004	0.892	-0.003	0.177	-0.004	0.818	-0.004	|
	#	31	31	986.3	6e-05	0	6e-06	0	|	0	0	0	0	0	0	0	0	0	0	0	0	|
	#	32	32	970.8	0.0003	-0.002	2e-06	0	|	0	0	0	0	0	0	0	0	0	0	0	0	|
	#	33	33	240.8	0.004	-0.005	0.0001	0	|	2e-05	0	3e-105	0	0.0002	0	0.076	-0.003	0.0002	0	0.01	-0.001	|
	#	34	34	249.9	6e-05	0	5e-06	0	|	0	0	3e-109	0	0.0005	0	0.065	-0.002	0.0003	0	0.01	-0.001	|
	#	35	35	91.2	0.155	-0.015	0.013	0	|	0.011	-0.001	3e-40	0	0.06	-0.002	0.618	-0.005	0.06	-0.002	0.499	-0.005	|
	#	36	36	95.4	0.048	-0.009	0.005	0	|	0.005	-0.001	4e-42	0	0.031	-0.002	0.606	-0.005	0.031	-0.002	0.33	-0.005	|
	#	37	37	409.3	8e-05	-0.001	1e-06	0	|	0	0	2e-178	0	0	0	0.001	0	0	0	0	0	|
	#	38	38	402.8	0.0001	-0.001	2e-06	0	|	0	0	1e-175	0	0	0	0.002	0	0	0	0	0	|
	#	39	39	82.2	0.056	-0.011	0.004	0	|	0.004	-0.001	2e-36	0	0.041	-0.002	0.697	-0.005	0.041	-0.002	0.419	-0.005	|
	#	40	40	69.2	0.145	-0.014	0.013	0	|	0.014	-0.001	9e-31	0	0.07	-0.003	0.768	-0.004	0.07	-0.003	0.566	-0.005	|
	#	41	41	9.8	0.572	-0.011	0.193	-0.001	|	0.187	-0.004	6e-05	0	0.373	-0.005	0.98	-0.001	0.373	-0.005	0.965	-0.002	|
	#	42	42	-9.8	0.757	-0.008	0.39	-0.002	|	0.39	-0.005	1	0	0.627	-0.005	0.993	-0.001	0.627	-0.005	0.996	-0.001	|
	#	43	43	99.6	0.078	-0.016	0.003	0	|	0.003	-0.001	6e-44	0	0.046	-0.002	0.565	-0.005	0.046	-0.002	0.449	-0.005	|
	#	44	44	99.3	0.086	-0.012	0.007	0	|	0.006	-0.001	7e-44	0	0.05	-0.002	0.566	-0.005	0.05	-0.002	0.445	-0.005	|
	#	reading	mus-16SRed_bacteria-gb.pv
	#	0	1+	2	9	10	|	3	4	5	6	7	8
	#	rank	item	obs	au	(se)	np	(se)	|	bp	(se)	pp	(se)	kh	(se)	sh	(se)	wkh	(se)	wsh	(se)	|
	#	1	1	59.2	0.107	-0.009	0.027	-0.001	|	0.025	-0.002	2e-26	0	0.106	-0.003	0.595	-0.005	0.091	-0.003	0.472	-0.005	|
	#	2	2	53.2	0.125	-0.01	0.029	-0.001	|	0.029	-0.002	8e-24	0	0.117	-0.003	0.634	-0.005	0.098	-0.003	0.492	-0.005	|
	#	3	3	676.7	2e-06	0	2e-06	0	|	0	0	1e-294	0	0	0	0	0	0	0	0	0	|
	#	4	4	713.8	0.001	-0.01	9e-07	0	|	0	0	1e-310	0	0	0	0	0	0	0	0	0	|
	#	5	5	437.6	6e-101	0	6e-26	0	|	0	0	9e-191	0	0	0	0	0	0	0	0	0	|
	#	6	6	451.3	3e-37	0	1e-14	0	|	0	0	1e-196	0	0	0	0	0	0	0	0	0	|
	#	7	7	504.8	5e-69	0	6e-21	0	|	0	0	6e-220	0	0	0	0	0	0	0	0	0	|
	#	8	8	473.8	1e-46	0	4e-16	0	|	0	0	2e-206	0	0	0	0	0	0	0	0	0	|
	#	9	9	487.1	5e-34	0	4e-14	0	|	0	0	3e-212	0	0	0	0	0	0	0	0	0	|
	#	10	10	494.3	9e-44	0	4e-16	0	|	0	0	2e-215	0	0	0	0	0	0	0	0	0	|
	#	11	11	5.3	0.637	-0.009	0.369	-0.002	|	0.374	-0.005	0.005	0	0.44	-0.005	0.933	-0.003	0.44	-0.005	0.927	-0.003	|
	#	12	12	-5.3	0.673	-0.009	0.507	-0.002	|	0.505	-0.005	0.995	0	0.56	-0.005	0.964	-0.002	0.56	-0.005	0.969	-0.002	|
	#	13	13	722.7	5e-32	0	1e-13	0	|	0	0	1e-314	0	0	0	0	0	0	0	0	0	|
	#	14	14	740.2	2e-58	0	3e-18	0	|	0	0	3e-322	0	0	0	0	0	0	0	0	0	|
	#	15	15	494	1e-45	0	9e-17	0	|	0	0	3e-215	0	0	0	0	0	0	0	0	0	|
	#	16	16	486.8	1e-10	0	1e-07	0	|	0	0	4e-212	0	0	0	0	0	0	0	0	0	|
	#	17	17	509	2e-11	0	4e-08	0	|	0	0	8e-222	0	0	0	0	0	0	0	0	0	|
	#	18	18	499.8	1e-41	0	6e-15	0	|	0	0	9e-218	0	0	0	0	0	0	0	0	0	|
	#	19	19	493.1	1e-95	0	2e-24	0	|	0	0	7e-215	0	0	0	0	0	0	0	0	0	|
	#	20	20	477.5	8e-165	0	2e-35	0	|	0	0	4e-208	0	0	0	0	0	0	0	0	0	|
	#	21	21	141.7	0.004	-0.002	0.001	0	|	0.001	0	3e-62	0	0.003	-0.001	0.112	-0.003	0.003	-0.001	0.035	-0.002	|
	#	22	22	156.1	0.003	-0.002	0.0004	0	|	0.0003	0	2e-68	0	0.002	0	0.072	-0.003	0.002	0	0.025	-0.002	|
	#	23	23	793.7	1e-18	0	3e-12	0	|	0	0	0	0	0	0	0	0	0	0	0	0	|
	#	24	24	816.4	2e-74	0	2e-21	0	|	0	0	0	0	0	0	0	0	0	0	0	0	|
	#	25	25	423.2	7e-07	0	1e-06	0	|	0	0	2e-184	0	0	0	0	0	0	0	0	0	|
	#	26	26	397.1	0.0001	-0.001	8e-07	0	|	0	0	3e-173	0	0	0	0	0	0	0	0	0	|
	#	27	27	517.1	3e-31	0	5e-14	0	|	0	0	3e-225	0	0	0	0	0	0	0	0	0	|
	#	28	28	510.2	4e-05	0	2e-06	0	|	0	0	3e-222	0	0	0	0	0	0	0	0	0	|
	#	29	29	442.8	3e-44	0	2e-15	0	|	0	0	5e-193	0	0	0	0	0	0	0	0	0	|
	#	30	30	451.8	4e-80	0	1e-21	0	|	0	0	6e-197	0	0	0	0	0	0	0	0	0	|
	#	31	31	45.8	0.157	-0.011	0.035	-0.001	|	0.034	-0.002	1e-20	0	0.154	-0.004	0.673	-0.005	0.114	-0.003	0.519	-0.005	|
	#	32	32	49.6	0.133	-0.01	0.032	-0.001	|	0.033	-0.002	3e-22	0	0.144	-0.004	0.643	-0.005	0.098	-0.003	0.461	-0.005	|
	#	33	33	719.1	4e-06	0	1e-07	0	|	0	0	5e-313	0	0	0	0	0	0	0	0	0	|
	#	34	34	724	1e-07	0	9e-07	0	|	0	0	4e-315	0	0	0	0	0	0	0	0	0	|
	#	35	35	451.6	3e-05	0	2e-06	0	|	0	0	7e-197	0	0	0	0	0	0	0	0	0	|
	#	36	36	418.1	2e-10	0	6e-08	0	|	0	0	3e-182	0	0	0	0	0	0	0	0	0	|
	#	37	37	552.2	9e-57	0	5e-18	0	|	0	0	1e-240	0	0	0	0	0	0	0	0	0	|
	#	38	38	533.2	3e-52	0	1e-16	0	|	0	0	3e-232	0	0	0	0	0	0	0	0	0	|
	#	39	39	401.6	2e-46	0	3e-16	0	|	0	0	4e-175	0	0	0	0	0	0	0	0	0	|
	#	40	40	424.3	2e-134	0	2e-31	0	|	0	0	5e-185	0	0	0	0	0	0	0	0	0	|
	#	41	41	423.8	0.001	-0.017	1e-07	0	|	0	0	9e-185	0	0	0	0	0	0	0	0	0	|
	#	42	42	439.7	3e-08	0	1e-07	0	|	0	0	1e-191	0	0	0	0	0	0	0	0	0	|
	#	43	43	447	7e-06	0	3e-06	0	|	0	0	7e-195	0	0	0	0	0	0	0	0	0	|
	#	44	44	428.3	3e-28	0	7e-14	0	|	0	0	1e-186	0	0	0	0	0	0	0	0	0	|
	#	reading	mus-23S_bacteria-gb.pv
	#	0	1+	2	9	10	|	3	4	5	6	7	8
	#	rank	item	obs	au	(se)	np	(se)	|	bp	(se)	pp	(se)	kh	(se)	sh	(se)	wkh	(se)	wsh	(se)	|
	#	1	1	1926.5	2e-51	0	5e-18	0	|	0	0	0	0	0	0	0	0	0	0	0	0	|
	#	2	2	2133.8	2e-30	0	1e-13	0	|	0	0	0	0	0	0	0	0	0	0	0	0	|
	#	3	3	32	0.288	-0.011	0.1	-0.001	|	0.103	-0.003	8e-15	0	0.182	-0.004	0.878	-0.003	0.182	-0.004	0.783	-0.004	|
	#	4	4	38.7	0.17	-0.013	0.026	-0.001	|	0.024	-0.002	1e-17	0	0.124	-0.003	0.846	-0.004	0.124	-0.003	0.674	-0.005	|
	#	5	5	216.4	2e-60	0	9e-18	0	|	0	0	7e-95	0	0	0	0.074	-0.003	0	0	0.003	-0.001	|
	#	6	6	184.2	0.003	-0.003	0.0001	0	|	0	0	7e-81	0	0.001	0	0.141	-0.003	0.001	0	0.01	-0.001	|
	#	7	7	683.7	2e-82	0	2e-21	0	|	0	0	8e-298	0	0	0	0	0	0	0	0	0	|
	#	8	8	902.1	4e-108	0	2e-27	0	|	0	0	0	0	0	0	0	0	0	0	0	0	|
	#	9	9	256.4	3e-06	0	9e-07	0	|	0	0	3e-112	0	0.0001	0	0.03	-0.002	0.0001	0	0.002	0	|
	#	10	10	278.5	0.001	-0.002	8e-06	0	|	0	0	7e-122	0	0	0	0.022	-0.001	0	0	0.001	0	|
	#	11	11	1785.9	1e-40	0	1e-15	0	|	0	0	0	0	0	0	0	0	0	0	0	0	|
	#	12	12	1595.7	0.001	-0.014	8e-07	0	|	0	0	0	0	0	0	0	0	0	0	0	0	|
	#	13	13	0.7	0.685	-0.009	0.363	-0.002	|	0.367	-0.005	0.337	0	0.486	-0.005	0.981	-0.001	0.486	-0.005	0.98	-0.001	|
	#	14	14	-0.7	0.692	-0.009	0.402	-0.002	|	0.401	-0.005	0.663	0	0.514	-0.005	0.975	-0.002	0.514	-0.005	0.978	-0.001	|
	#	15	15	94.7	0.02	-0.006	0.002	0	|	0.002	0	5e-42	0	0.01	-0.001	0.569	-0.005	0.008	-0.001	0.11	-0.003	|
	#	16	16	85	0.03	-0.008	0.002	0	|	0.002	0	8e-38	0	0.016	-0.001	0.626	-0.005	0.008	-0.001	0.11	-0.003	|
	#	17	17	547.9	3e-96	0	3e-23	0	|	0	0	7e-239	0	0	0	0	0	0	0	0	0	|
	#	18	18	523	6e-87	0	2e-23	0	|	0	0	5e-228	0	0	0	0	0	0	0	0	0	|
	#	19	19	143.2	0.006	-0.002	0.001	0	|	0.001	0	4e-63	0	0.007	-0.001	0.3	-0.005	0.007	-0.001	0.084	-0.003	|
	#	20	20	154.3	0.005	-0.002	0.001	0	|	0.001	0	6e-68	0	0.007	-0.001	0.241	-0.004	0.006	-0.001	0.086	-0.003	|
	#	21	21	2161.4	9e-09	0	5e-07	0	|	0	0	0	0	0	0	0	0	0	0	0	0	|
	#	22	22	2086.8	8e-115	0	3e-27	0	|	0	0	0	0	0	0	0	0	0	0	0	0	|
	#	23	23	200	0.004	-0.002	0.001	0	|	0.0005	0	1e-87	0	0.005	-0.001	0.132	-0.003	0.004	-0.001	0.057	-0.002	|
	#	24	24	196.5	0.005	-0.003	0.001	0	|	0.0004	0	3e-86	0	0.005	-0.001	0.14	-0.003	0.004	-0.001	0.057	-0.002	|
	#	25	25	304.4	0.0003	-0.001	6e-06	0	|	6e-06	0	4e-133	0	0.0002	0	0.008	-0.001	0.0001	0	0.001	0	|
	#	26	26	308.9	0.001	-0.001	5e-05	0	|	0	0	5e-135	0	6e-05	0	0.006	-0.001	6e-05	0	0.0005	0	|
	#	27	27	821.3	1e-54	0	9e-17	0	|	0	0	0	0	0	0	0	0	0	0	0	0	|
	#	28	28	899.1	2e-71	0	2e-19	0	|	0	0	0	0	0	0	0	0	0	0	0	0	|
	#	29	29	386	8e-06	0	1e-06	0	|	0	0	2e-168	0	4e-05	0	0.0005	0	1e-05	0	5e-05	0	|
	#	30	30	367.3	3e-06	0	1e-06	0	|	0	0	2e-160	0	0	0	0.001	0	0	0	0	0	|
	#	31	31	1844.9	0.001	-0.002	3e-05	0	|	0	0	0	0	0	0	0	0	0	0	0	0	|
	#	32	32	1810.2	0.0002	0	6e-05	0	|	0	0	0	0	0	0	0	0	0	0	0	0	|
	#	33	33	46.4	0.13	-0.01	0.029	-0.001	|	0.029	-0.002	5e-21	0	0.114	-0.003	0.804	-0.004	0.101	-0.003	0.582	-0.005	|
	#	34	34	36.4	0.243	-0.011	0.072	-0.001	|	0.069	-0.003	1e-16	0	0.165	-0.004	0.842	-0.004	0.156	-0.004	0.692	-0.005	|
	#	35	35	170.9	0.001	-0.002	0.0001	0	|	0	0	4e-75	0	0.002	0	0.193	-0.004	0.002	0	0.025	-0.002	|
	#	36	36	236.8	0.002	-0.004	2e-05	0	|	0	0	1e-103	0	0.0002	0	0.045	-0.002	0.0002	0	0.003	-0.001	|
	#	37	37	657.7	2e-12	0	5e-09	0	|	0	0	2e-286	0	0	0	0	0	0	0	0	0	|
	#	38	38	638.7	8e-52	0	1e-16	0	|	0	0	3e-278	0	0	0	0	0	0	0	0	0	|
	#	39	39	323.8	1e-05	0	4e-07	0	|	0	0	2e-141	0	3e-05	0	0.005	-0.001	0	0	0.0002	0	|
	#	40	40	271	0.0001	0	7e-06	0	|	0	0	1e-118	0	0.0003	0	0.022	-0.001	0.0002	0	0.004	-0.001	|
	#	41	41	320	8e-73	0	1e-20	0	|	0	0	7e-140	0	0	0	0.004	-0.001	0	0	0.001	0	|
	#	42	42	323.8	6e-23	0	1e-11	0	|	0	0	2e-141	0	0	0	0.004	-0.001	0	0	0.0001	0	|
	#	43	43	165	0.008	-0.005	0.0004	0	|	0	0	2e-72	0	0.002	0	0.218	-0.004	0.002	0	0.024	-0.002	|
	#	44	44	179	0.001	-0.001	0.0002	0	|	1e-05	0	1e-78	0	0.001	0	0.172	-0.004	0.001	0	0.011	-0.001	|
	#	reading	mus-bij_bacteria-RYKM.pv
	#	0	1+	2	9	10	|	3	4	5	6	7	8
	#	rank	item	obs	au	(se)	np	(se)	|	bp	(se)	pp	(se)	kh	(se)	sh	(se)	wkh	(se)	wsh	(se)	|
	#	1	1	1065	2e-45	0	2e-16	0	|	0	0	0	0	0	0	0	0	0	0	0	0	|
	#	2	2	1230.8	3e-59	0	3e-18	0	|	0	0	0	0	0	0	0	0	0	0	0	0	|
	#	3	3	132	0.001	-0.001	4e-05	0	|	0	0	5e-58	0	0.001	0	0.214	-0.004	0.001	0	0.016	-0.001	|
	#	4	4	137.4	0.007	-0.007	0.0002	0	|	1e-05	0	2e-60	0	0.001	0	0.193	-0.004	0.001	0	0.015	-0.001	|
	#	5	5	53.2	0.032	-0.007	0.004	0	|	0.004	-0.001	8e-24	0	0.015	-0.001	0.764	-0.004	0.015	-0.001	0.221	-0.004	|
	#	6	6	37.4	0.055	-0.011	0.003	0	|	0.003	-0.001	6e-17	0	0.015	-0.001	0.872	-0.003	0.015	-0.001	0.22	-0.004	|
	#	7	7	268.3	2e-31	0	6e-14	0	|	0	0	3e-117	0	0	0	0.005	-0.001	0	0	5e-06	0	|
	#	8	8	374.2	0.0005	-0.001	0.0001	0	|	0	0	3e-163	0	0	0	0.0002	0	0	0	0	0	|
	#	9	9	49.8	0.036	-0.008	0.004	0	|	0.004	-0.001	2e-22	0	0.022	-0.001	0.785	-0.004	0.022	-0.001	0.273	-0.004	|
	#	10	10	35.5	0.288	-0.011	0.093	-0.001	|	0.09	-0.003	4e-16	0	0.151	-0.004	0.878	-0.003	0.151	-0.004	0.763	-0.004	|
	#	11	11	907.8	3e-131	0	4e-30	0	|	0	0	0	0	0	0	0	0	0	0	0	0	|
	#	12	12	795.2	0.0002	-0.001	8e-06	0	|	0	0	0	0	0	0	0	0	0	0	0	0	|
	#	13	13	126.7	0.01	-0.005	0.001	0	|	0.0004	0	9e-56	0	0.002	0	0.244	-0.004	0.002	0	0.032	-0.002	|
	#	14	14	128.8	0.002	-0.002	0.0002	0	|	0.0003	0	1e-56	0	0.002	0	0.238	-0.004	0.002	0	0.032	-0.002	|
	#	15	15	53.2	0.111	-0.013	0.011	0	|	0.011	-0.001	8e-24	0	0.036	-0.002	0.748	-0.004	0.036	-0.002	0.382	-0.005	|
	#	16	16	51.2	0.116	-0.01	0.02	0	|	0.02	-0.001	6e-23	0	0.048	-0.002	0.762	-0.004	0.048	-0.002	0.448	-0.005	|
	#	17	17	179.2	0.0003	-0.001	3e-05	0	|	0	0	2e-78	0	0	0	0.064	-0.002	0	0	0.003	-0.001	|
	#	18	18	182.3	0.001	-0.001	6e-05	0	|	0	0	7e-80	0	0	0	0.056	-0.002	0	0	0.002	0	|
	#	19	19	7.9	0.566	-0.011	0.23	-0.001	|	0.239	-0.004	0.0004	0	0.323	-0.005	0.982	-0.001	0.323	-0.005	0.956	-0.002	|
	#	20	20	-7.9	0.875	-0.005	0.441	-0.002	|	0.44	-0.005	1	0	0.677	-0.005	0.999	0	0.677	-0.005	1	0	|
	#	21	21	1273.1	9e-46	0	1e-16	0	|	0	0	0	0	0	0	0	0	0	0	0	0	|
	#	22	22	1248.4	2e-37	0	5e-15	0	|	0	0	0	0	0	0	0	0	0	0	0	0	|
	#	23	23	255.7	1e-06	0	1e-06	0	|	0	0	9e-112	0	0	0	0.012	-0.001	0	0	0	0	|
	#	24	24	268.7	7e-08	0	8e-07	0	|	0	0	2e-117	0	0	0	0.01	-0.001	0	0	0	0	|
	#	25	25	83.7	0.02	-0.01	0.001	0	|	0.0003	0	4e-37	0	0.006	-0.001	0.511	-0.005	0.006	-0.001	0.111	-0.003	|
	#	26	26	75.6	0.009	-0.004	0.001	0	|	0.0005	0	1e-33	0	0.008	-0.001	0.582	-0.005	0.008	-0.001	0.153	-0.004	|
	#	27	27	360	0.0003	-0.001	3e-06	0	|	0	0	5e-157	0	0	0	0.0002	0	0	0	0	0	|
	#	28	28	436.2	0.0001	-0.001	4e-06	0	|	0	0	4e-190	0	0	0	0	0	0	0	0	0	|
	#	29	29	73.6	0.043	-0.009	0.003	0	|	0.004	-0.001	1e-32	0	0.037	-0.002	0.592	-0.005	0.037	-0.002	0.362	-0.005	|
	#	30	30	64.2	0.104	-0.011	0.013	0	|	0.014	-0.001	1e-28	0	0.054	-0.002	0.675	-0.005	0.054	-0.002	0.475	-0.005	|
	#	31	31	977.4	8e-67	0	1e-20	0	|	0	0	0	0	0	0	0	0	0	0	0	0	|
	#	32	32	956.9	2e-08	0	3e-07	0	|	0	0	0	0	0	0	0	0	0	0	0	0	|
	#	33	33	165	2e-07	0	2e-06	0	|	4e-05	0	2e-72	0	0.0005	0	0.117	-0.003	0.0005	0	0.008	-0.001	|
	#	34	34	149.4	0.005	-0.006	0.0001	0	|	0.0002	0	1e-65	0	0.0004	0	0.159	-0.004	0.0004	0	0.02	-0.001	|
	#	35	35	86.8	0.04	-0.014	0.001	0	|	0.001	0	2e-38	0	0.009	-0.001	0.471	-0.005	0.009	-0.001	0.132	-0.003	|
	#	36	36	88.6	0.007	-0.003	0.001	0	|	0.001	0	3e-39	0	0.006	-0.001	0.468	-0.005	0.006	-0.001	0.087	-0.003	|
	#	37	37	252.6	5e-45	0	1e-15	0	|	0	0	2e-110	0	0	0	0.009	-0.001	0	0	0	0	|
	#	38	38	236.5	2e-10	0	4e-08	0	|	0	0	2e-103	0	0	0	0.014	-0.001	0	0	0.0001	0	|
	#	39	39	36.5	0.206	-0.012	0.048	-0.001	|	0.048	-0.002	1e-16	0	0.134	-0.003	0.888	-0.003	0.134	-0.003	0.766	-0.004	|
	#	40	40	24.9	0.357	-0.012	0.122	-0.001	|	0.116	-0.003	2e-11	0	0.203	-0.004	0.936	-0.002	0.203	-0.004	0.859	-0.003	|
	#	41	41	93.6	0.007	-0.005	0.0003	0	|	0.0002	0	2e-41	0	0.005	-0.001	0.434	-0.005	0.005	-0.001	0.084	-0.003	|
	#	42	42	85.6	0.011	-0.005	0.001	0	|	0.001	0	7e-38	0	0.005	-0.001	0.495	-0.005	0.005	-0.001	0.087	-0.003	|
	#	43	43	90.2	0.026	-0.01	0.001	0	|	0.0005	0	6e-40	0	0.009	-0.001	0.444	-0.005	0.009	-0.001	0.14	-0.003	|
	#	44	44	84.8	0.017	-0.005	0.002	0	|	0.002	0	2e-37	0	0.015	-0.001	0.49	-0.005	0.015	-0.001	0.186	-0.004	|
	#	reading	mus-bij_bacteria-gb-RY.pv
	#	0	1+	2	9	10	|	3	4	5	6	7	8
	#	rank	item	obs	au	(se)	np	(se)	|	bp	(se)	pp	(se)	kh	(se)	sh	(se)	wkh	(se)	wsh	(se)	|
	#	1	1	448.8	7e-07	0	8e-07	0	|	0	0	1e-195	0	0	0	0	0	0	0	0	0	|
	#	2	2	515	5e-52	0	4e-19	0	|	0	0	2e-224	0	0	0	0	0	0	0	0	0	|
	#	3	3	131.2	0.003	-0.005	5e-05	0	|	0	0	1e-57	0	0.0005	0	0.029	-0.002	0.0005	0	0.004	-0.001	|
	#	4	4	125.4	0.0002	0	1e-05	0	|	0	0	3e-55	0	0.001	0	0.039	-0.002	0.001	0	0.007	-0.001	|
	#	5	5	86.2	0.004	-0.005	6e-05	0	|	0.0002	0	4e-38	0	0.002	0	0.143	-0.003	0.002	0	0.043	-0.002	|
	#	6	6	88.1	8e-05	0	6e-06	0	|	0	0	5e-39	0	0.002	0	0.134	-0.003	0.002	0	0.032	-0.002	|
	#	7	7	49.9	0.081	-0.008	0.019	0	|	0.018	-0.001	2e-22	0	0.056	-0.002	0.509	-0.005	0.049	-0.002	0.343	-0.005	|
	#	8	8	60.5	0.059	-0.007	0.014	0	|	0.013	-0.001	5e-27	0	0.04	-0.002	0.395	-0.005	0.037	-0.002	0.244	-0.004	|
	#	9	9	68.7	0.032	-0.008	0.002	0	|	0.002	0	1e-30	0	0.01	-0.001	0.289	-0.005	0.009	-0.001	0.132	-0.003	|
	#	10	10	67.5	0.021	-0.006	0.002	0	|	0.002	0	5e-30	0	0.012	-0.001	0.297	-0.005	0.012	-0.001	0.146	-0.004	|
	#	11	11	342	2e-05	0	1e-05	0	|	0	0	3e-149	0	0	0	0	0	0	0	0	0	|
	#	12	12	339.9	0.0002	0	2e-05	0	|	0	0	2e-148	0	0	0	0	0	0	0	0	0	|
	#	13	13	115.1	0.004	-0.002	0.001	0	|	0.0005	0	1e-50	0	0.001	0	0.062	-0.002	0.001	0	0.021	-0.001	|
	#	14	14	117.6	0.002	-0.001	0.0004	0	|	0.0001	0	8e-52	0	0.001	0	0.057	-0.002	0.001	0	0.019	-0.001	|
	#	15	15	101.3	0.011	-0.006	0.0005	0	|	0.0001	0	1e-44	0	0.002	0	0.077	-0.003	0.002	0	0.019	-0.001	|
	#	16	16	102	0.006	-0.006	0.0002	0	|	0.0001	0	5e-45	0	0.002	0	0.074	-0.003	0.002	0	0.019	-0.001	|
	#	17	17	4.1	0.599	-0.01	0.371	-0.002	|	0.379	-0.005	0.017	0	0.41	-0.005	0.959	-0.002	0.41	-0.005	0.945	-0.002	|
	#	18	18	-4.1	0.763	-0.008	0.54	-0.002	|	0.538	-0.005	0.983	0	0.59	-0.005	0.981	-0.001	0.59	-0.005	0.986	-0.001	|
	#	19	19	68.5	0.049	-0.008	0.006	0	|	0.003	-0.001	2e-30	0	0.011	-0.001	0.283	-0.005	0.011	-0.001	0.165	-0.004	|
	#	20	20	69.6	0.024	-0.011	0.001	0	|	0.001	0	6e-31	0	0.007	-0.001	0.274	-0.004	0.007	-0.001	0.102	-0.003	|
	#	21	21	617.9	4e-57	0	2e-17	0	|	0	0	4e-269	0	0	0	0	0	0	0	0	0	|
	#	22	22	620.9	2e-31	0	5e-14	0	|	0	0	2e-270	0	0	0	0	0	0	0	0	0	|
	#	23	23	153.6	2e-60	0	9e-18	0	|	0	0	2e-67	0	0	0	0.013	-0.001	0	0	6e-05	0	|
	#	24	24	154.9	2e-56	0	2e-18	0	|	0	0	5e-68	0	0	0	0.013	-0.001	0	0	0.0001	0	|
	#	25	25	87.9	0.01	-0.005	0.001	0	|	0	0	6e-39	0	0.001	0	0.141	-0.003	0.001	0	0.022	-0.001	|
	#	26	26	84.6	0.005	-0.006	0.0001	0	|	0.0001	0	2e-37	0	0.002	0	0.157	-0.004	0.002	0	0.027	-0.002	|
	#	27	27	67.2	0.033	-0.008	0.003	0	|	0.003	-0.001	6e-30	0	0.024	-0.002	0.329	-0.005	0.019	-0.001	0.147	-0.004	|
	#	28	28	71.9	0.024	-0.005	0.005	0	|	0.005	-0.001	6e-32	0	0.021	-0.001	0.295	-0.005	0.021	-0.001	0.153	-0.004	|
	#	29	29	85.3	0.0002	-0.001	2e-05	0	|	0	0	9e-38	0	0.001	0	0.152	-0.004	0.001	0	0.024	-0.002	|
	#	30	30	84.6	0.004	-0.005	9e-05	0	|	3e-05	0	2e-37	0	0.002	0	0.154	-0.004	0.002	0	0.022	-0.001	|
	#	31	31	367.4	0.0001	0	2e-05	0	|	0	0	3e-160	0	0	0	0	0	0	0	0	0	|
	#	32	32	357.5	0.0004	-0.001	6e-05	0	|	0	0	6e-156	0	0	0	0	0	0	0	0	0	|
	#	33	33	129.4	0.005	-0.007	7e-05	0	|	0	0	6e-57	0	0.001	0	0.036	-0.002	0.001	0	0.01	-0.001	|
	#	34	34	126.9	0.001	-0.002	5e-05	0	|	0.0001	0	8e-56	0	0.0005	0	0.041	-0.002	0.0005	0	0.01	-0.001	|
	#	35	35	112.5	7e-155	0	6e-33	0	|	0	0	1e-49	0	0.001	0	0.049	-0.002	0.001	0	0.007	-0.001	|
	#	36	36	124.9	5e-08	0	1e-07	0	|	0	0	5e-55	0	3e-05	0	0.021	-0.001	3e-05	0	0.002	0	|
	#	37	37	44.1	0.051	-0.009	0.006	0	|	0.007	-0.001	7e-20	0	0.035	-0.002	0.585	-0.005	0.035	-0.002	0.293	-0.005	|
	#	38	38	37.9	0.126	-0.01	0.026	-0.001	|	0.026	-0.002	3e-17	0	0.055	-0.002	0.659	-0.005	0.055	-0.002	0.405	-0.005	|
	#	39	39	59	0.025	-0.007	0.002	0	|	0.003	-0.001	2e-26	0	0.008	-0.001	0.392	-0.005	0.008	-0.001	0.122	-0.003	|
	#	40	40	72	0.022	-0.011	0.001	0	|	0.001	0	5e-32	0	0.004	-0.001	0.254	-0.004	0.004	-0.001	0.063	-0.002	|
	#	41	41	90.9	0.008	-0.006	0.0003	0	|	0	0	3e-40	0	0.002	0	0.12	-0.003	0.002	0	0.026	-0.002	|
	#	42	42	79.3	0.001	-0.001	0.0001	0	|	0	0	4e-35	0	0.003	-0.001	0.203	-0.004	0.003	-0.001	0.037	-0.002	|
	#	43	43	113.5	0.0004	-0.001	8e-06	0	|	0	0	5e-50	0	0.001	0	0.047	-0.002	0.001	0	0.009	-0.001	|
	#	44	44	113	0.0002	-0.001	1e-05	0	|	0	0	8e-50	0	0.001	0	0.048	-0.002	0.001	0	0.008	-0.001	|
	#	reading	mus-bij_bacteria-gb.pv
	#	0	1+	2	9	10	|	3	4	5	6	7	8
	#	rank	item	obs	au	(se)	np	(se)	|	bp	(se)	pp	(se)	kh	(se)	sh	(se)	wkh	(se)	wsh	(se)	|
	#	1	1	1479.4	4e-43	0	3e-15	0	|	0	0	0	0	0	0	0	0	0	0	0	0	|
	#	2	2	1682.6	5e-68	0	6e-21	0	|	0	0	0	0	0	0	0	0	0	0	0	0	|
	#	3	3	115.6	0.021	-0.006	0.002	0	|	0.002	0	6e-51	0	0.009	-0.001	0.533	-0.005	0.009	-0.001	0.1	-0.003	|
	#	4	4	149.8	0.0002	0	7e-05	0	|	0.0001	0	9e-66	0	0.002	0	0.395	-0.005	0.002	0	0.028	-0.002	|
	#	5	5	71.1	0.147	-0.013	0.018	0	|	0.018	-0.001	1e-31	0	0.071	-0.003	0.818	-0.004	0.071	-0.003	0.577	-0.005	|
	#	6	6	53	0.269	-0.015	0.037	-0.001	|	0.035	-0.002	9e-24	0	0.132	-0.003	0.892	-0.003	0.132	-0.003	0.763	-0.004	|
	#	7	7	588.3	0.0003	-0.006	1e-07	0	|	0	0	3e-256	0	0	0	5e-05	0	0	0	0	0	|
	#	8	8	782.9	6e-47	0	1e-16	0	|	0	0	0	0	0	0	0	0	0	0	0	0	|
	#	9	9	145.6	0.005	-0.004	0.0002	0	|	0.0003	0	6e-64	0	0.008	-0.001	0.413	-0.005	0.008	-0.001	0.102	-0.003	|
	#	10	10	184.3	0.004	-0.003	0.0002	0	|	0.0002	0	9e-81	0	0.005	-0.001	0.237	-0.004	0.004	-0.001	0.062	-0.002	|
	#	11	11	1282.8	2e-06	0	4e-07	0	|	0	0	0	0	0	0	0	0	0	0	0	0	|
	#	12	12	1104.7	0.0004	-0.003	2e-06	0	|	0	0	0	0	0	0	0	0	0	0	0	0	|
	#	13	13	129.2	0.018	-0.005	0.003	0	|	0.001	0	8e-57	0	0.004	-0.001	0.476	-0.005	0.004	-0.001	0.052	-0.002	|
	#	14	14	142.1	0.01	-0.005	0.001	0	|	0.001	0	2e-62	0	0.003	-0.001	0.427	-0.005	0.003	-0.001	0.046	-0.002	|
	#	15	15	14.3	0.527	-0.012	0.161	-0.001	|	0.155	-0.004	6e-07	0	0.292	-0.005	0.978	-0.001	0.292	-0.005	0.935	-0.002	|
	#	16	16	-14.3	0.85	-0.006	0.44	-0.002	|	0.45	-0.005	1	0	0.708	-0.005	0.997	-0.001	0.708	-0.005	0.999	0	|
	#	17	17	466.8	0.001	-0.001	9e-05	0	|	0	0	2e-203	0	0	0	0.001	0	0	0	0	0	|
	#	18	18	439.4	5e-06	0	3e-07	0	|	0	0	1e-191	0	0	0	0.001	0	0	0	0	0	|
	#	19	19	44.2	0.341	-0.013	0.084	-0.001	|	0.079	-0.003	6e-20	0	0.189	-0.004	0.916	-0.003	0.189	-0.004	0.854	-0.004	|
	#	20	20	38.7	0.452	-0.013	0.095	-0.001	|	0.093	-0.003	1e-17	0	0.221	-0.004	0.937	-0.002	0.221	-0.004	0.901	-0.003	|
	#	21	21	1796	3e-71	0	3e-21	0	|	0	0	0	0	0	0	0	0	0	0	0	0	|
	#	22	22	1734.1	6e-05	-0.001	7e-07	0	|	0	0	0	0	0	0	0	0	0	0	0	0	|
	#	23	23	379.2	1e-52	0	7e-17	0	|	0	0	2e-165	0	3e-05	0	0.015	-0.001	3e-05	0	8e-05	0	|
	#	24	24	389.5	8e-51	0	2e-17	0	|	0	0	7e-170	0	0	0	0.014	-0.001	0	0	0	0	|
	#	25	25	137.6	0.045	-0.011	0.002	0	|	0.002	0	2e-60	0	0.033	-0.002	0.455	-0.005	0.033	-0.002	0.347	-0.005	|
	#	26	26	119.4	0.094	-0.014	0.007	0	|	0.006	-0.001	1e-52	0	0.049	-0.002	0.557	-0.005	0.049	-0.002	0.473	-0.005	|
	#	27	27	730.3	6e-54	0	4e-18	0	|	0	0	7e-318	0	0	0	0	0	0	0	0	0	|
	#	28	28	802.1	5e-37	0	2e-14	0	|	0	0	0	0	0	0	0	0	0	0	0	0	|
	#	29	29	241.8	6e-07	0	7e-07	0	|	7e-06	0	9e-106	0	0.002	0	0.088	-0.003	0.0004	0	0.014	-0.001	|
	#	30	30	231.1	0.007	-0.011	4e-05	0	|	6e-05	0	4e-101	0	0.002	0	0.108	-0.003	0.001	0	0.021	-0.001	|
	#	31	31	1384.3	0.0001	-0.001	1e-06	0	|	0	0	0	0	0	0	0	0	0	0	0	0	|
	#	32	32	1355.1	0.0002	-0.006	8e-08	0	|	0	0	0	0	0	0	0	0	0	0	0	0	|
	#	33	33	168.8	0.006	-0.005	0.0003	0	|	0.0002	0	5e-74	0	0.002	0	0.33	-0.005	0.002	0	0.027	-0.002	|
	#	34	34	164.4	0.009	-0.004	0.001	0	|	0.0005	0	4e-72	0	0.004	-0.001	0.344	-0.005	0.004	-0.001	0.043	-0.002	|
	#	35	35	51.2	0.26	-0.015	0.034	-0.001	|	0.034	-0.002	6e-23	0	0.147	-0.004	0.882	-0.003	0.147	-0.004	0.781	-0.004	|
	#	36	36	90.5	0.123	-0.013	0.012	0	|	0.012	-0.001	5e-40	0	0.071	-0.003	0.723	-0.004	0.071	-0.003	0.539	-0.005	|
	#	37	37	598.7	1e-61	0	4e-19	0	|	0	0	9e-261	0	0	0	1e-05	0	0	0	0	0	|
	#	38	38	578.5	7e-06	0	4e-07	0	|	0	0	6e-252	0	0	0	0.0001	0	0	0	0	0	|
	#	39	39	134.5	0.04	-0.009	0.003	0	|	0.003	-0.001	4e-59	0	0.034	-0.002	0.473	-0.005	0.031	-0.002	0.346	-0.005	|
	#	40	40	105.7	0.1	-0.012	0.01	0	|	0.009	-0.001	1e-46	0	0.063	-0.002	0.631	-0.005	0.063	-0.002	0.529	-0.005	|
	#	41	41	159.4	0.015	-0.006	0.001	0	|	0.001	0	6e-70	0	0.018	-0.001	0.352	-0.005	0.018	-0.001	0.222	-0.004	|
	#	42	42	166	0.013	-0.007	0.0005	0	|	0.0004	0	8e-73	0	0.011	-0.001	0.325	-0.005	0.007	-0.001	0.114	-0.003	|
	#	43	43	45.3	0.314	-0.016	0.036	-0.001	|	0.036	-0.002	2e-20	0	0.161	-0.004	0.9	-0.003	0.161	-0.004	0.822	-0.004	|
	#	44	44	43.8	0.341	-0.014	0.062	-0.001	|	0.06	-0.002	9e-20	0	0.172	-0.004	0.905	-0.003	0.172	-0.004	0.813	-0.004	|
	#	reading	mus-bij_bacteria_mtDel.pv
	#	0	1+	2	9	10	|	3	4	5	6	7	8
	#	rank	item	obs	au	(se)	np	(se)	|	bp	(se)	pp	(se)	kh	(se)	sh	(se)	wkh	(se)	wsh	(se)	|
	#	1	1	1460.8	6e-06	0	2e-06	0	|	0	0	0	0	0	0	0	0	0	0	0	0	|
	#	2	2	1651.3	0.0002	-0.001	2e-06	0	|	0	0	0	0	0	0	0	0	0	0	0	0	|
	#	3	3	130.7	0.019	-0.007	0.001	0	|	0.001	0	2e-57	0	0.008	-0.001	0.454	-0.005	0.008	-0.001	0.134	-0.003	|
	#	4	4	169.3	0.003	-0.004	8e-05	0	|	0	0	3e-74	0	0.002	0	0.311	-0.005	0.002	0	0.041	-0.002	|
	#	5	5	108.5	0.061	-0.012	0.003	0	|	0.003	-0.001	7e-48	0	0.044	-0.002	0.61	-0.005	0.044	-0.002	0.433	-0.005	|
	#	6	6	78.7	0.17	-0.014	0.019	0	|	0.018	-0.001	6e-35	0	0.106	-0.003	0.772	-0.004	0.106	-0.003	0.693	-0.005	|
	#	7	7	588.3	0.001	-0.003	5e-06	0	|	0	0	3e-256	0	0	0	0	0	0	0	0	0	|
	#	8	8	734.4	4e-61	0	1e-19	0	|	0	0	1e-319	0	0	0	0	0	0	0	0	0	|
	#	9	9	208	5e-06	0	2e-06	0	|	0	0	4e-91	0	0.003	-0.001	0.155	-0.004	0.002	0	0.034	-0.002	|
	#	10	10	229.6	3e-05	0	9e-06	0	|	0	0	2e-100	0	0.001	0	0.107	-0.003	0.002	0	0.028	-0.002	|
	#	11	11	1225.4	2e-10	0	1e-07	0	|	0	0	0	0	0	0	0	0	0	0	0	0	|
	#	12	12	1075.8	9e-75	0	1e-23	0	|	0	0	0	0	0	0	0	0	0	0	0	0	|
	#	13	13	171.4	8e-05	0	3e-05	0	|	2e-05	0	3e-75	0	0.004	-0.001	0.307	-0.005	0.004	-0.001	0.066	-0.002	|
	#	14	14	174.6	0.008	-0.005	0.0003	0	|	0.0005	0	1e-76	0	0.005	-0.001	0.301	-0.005	0.005	-0.001	0.071	-0.003	|
	#	15	15	66.4	0.093	-0.011	0.01	0	|	0.009	-0.001	1e-29	0	0.084	-0.003	0.814	-0.004	0.078	-0.003	0.576	-0.005	|
	#	16	16	46.4	0.344	-0.013	0.075	-0.001	|	0.075	-0.003	6e-21	0	0.17	-0.004	0.891	-0.003	0.17	-0.004	0.804	-0.004	|
	#	17	17	500.6	9e-39	0	3e-15	0	|	0	0	3e-218	0	0	0	0.001	0	0	0	0	0	|
	#	18	18	463	5e-89	0	2e-24	0	|	0	0	7e-202	0	0	0	0.001	0	0	0	0	0	|
	#	19	19	87.5	0.162	-0.015	0.016	0	|	0.016	-0.001	9e-39	0	0.1	-0.003	0.721	-0.004	0.1	-0.003	0.673	-0.005	|
	#	20	20	76.9	0.189	-0.017	0.014	0	|	0.015	-0.001	4e-34	0	0.109	-0.003	0.783	-0.004	0.109	-0.003	0.707	-0.005	|
	#	21	21	1767.2	8e-28	0	3e-13	0	|	0	0	0	0	0	0	0	0	0	0	0	0	|
	#	22	22	1681.4	8e-53	0	6e-17	0	|	0	0	0	0	0	0	0	0	0	0	0	0	|
	#	23	23	351.4	7e-45	0	1e-15	0	|	0	0	2e-153	0	0	0	0.022	-0.001	0	0	6e-05	0	|
	#	24	24	364.2	4e-112	0	3e-27	0	|	0	0	6e-159	0	0	0	0.019	-0.001	0	0	2e-05	0	|
	#	25	25	124.1	0.039	-0.013	0.001	0	|	0.001	0	1e-54	0	0.029	-0.002	0.52	-0.005	0.029	-0.002	0.321	-0.005	|
	#	26	26	106.7	0.072	-0.011	0.006	0	|	0.005	-0.001	4e-47	0	0.046	-0.002	0.626	-0.005	0.046	-0.002	0.445	-0.005	|
	#	27	27	731.5	3e-70	0	5e-20	0	|	0	0	2e-318	0	0	0	0	0	0	0	0	0	|
	#	28	28	797.6	5e-51	0	2e-17	0	|	0	0	0	0	0	0	0	0	0	0	0	0	|
	#	29	29	218	8e-05	0	1e-05	0	|	0	0	2e-95	0	0.003	-0.001	0.125	-0.003	0.001	0	0.012	-0.001	|
	#	30	30	210.6	3e-06	0	3e-06	0	|	0	0	3e-92	0	0.004	-0.001	0.149	-0.004	0.001	0	0.027	-0.002	|
	#	31	31	1257.9	7e-06	0	5e-06	0	|	0	0	0	0	0	0	0	0	0	0	0	0	|
	#	32	32	1239.5	6e-06	0	3e-06	0	|	0	0	0	0	0	0	0	0	0	0	0	0	|
	#	33	33	140.9	0.043	-0.01	0.003	0	|	0.003	-0.001	6e-62	0	0.011	-0.001	0.424	-0.005	0.011	-0.001	0.125	-0.003	|
	#	34	34	141.5	0.026	-0.008	0.002	0	|	0.001	0	3e-62	0	0.008	-0.001	0.42	-0.005	0.008	-0.001	0.11	-0.003	|
	#	35	35	4.9	0.609	-0.012	0.147	-0.001	|	0.142	-0.003	0.007	0	0.408	-0.005	0.987	-0.001	0.408	-0.005	0.978	-0.001	|
	#	36	36	14.8	0.55	-0.011	0.216	-0.001	|	0.211	-0.004	4e-07	0	0.37	-0.005	0.976	-0.002	0.37	-0.005	0.962	-0.002	|
	#	37	37	462.6	3e-66	0	2e-20	0	|	0	0	1e-201	0	0	0	0.001	0	0	0	0	0	|
	#	38	38	436.8	5e-58	0	8e-19	0	|	0	0	2e-190	0	0	0	0.002	0	0	0	0	0	|
	#	39	39	64.9	0.24	-0.012	0.053	-0.001	|	0.053	-0.002	6e-29	0	0.161	-0.004	0.844	-0.004	0.161	-0.004	0.804	-0.004	|
	#	40	40	59.1	0.262	-0.014	0.038	-0.001	|	0.039	-0.002	2e-26	0	0.158	-0.004	0.866	-0.003	0.158	-0.004	0.801	-0.004	|
	#	41	41	136.3	0.03	-0.009	0.002	0	|	0.002	0	6e-60	0	0.023	-0.001	0.458	-0.005	0.023	-0.001	0.277	-0.004	|
	#	42	42	141.6	0.022	-0.008	0.001	0	|	0.002	0	3e-62	0	0.023	-0.002	0.426	-0.005	0.023	-0.002	0.251	-0.004	|
	#	43	43	2.5	0.612	-0.012	0.134	-0.001	|	0.132	-0.003	0.077	0	0.432	-0.005	0.993	-0.001	0.432	-0.005	0.987	-0.001	|
	#	44	44	-2.5	0.728	-0.009	0.265	-0.001	|	0.27	-0.004	0.916	0	0.568	-0.005	0.992	-0.001	0.568	-0.005	0.995	-0.001	|

## Sheet: AU
		↓ tree	alignment dataset →
	AU scores of the trees with the full complement of species without mitochondria according to the various alignments
			arb-16SRed_bacteria	arb-23S_bacteria	arb-bij_bacteria	arb-bij_bacteria-RY	arb-bij_bacteria-RYKM	mus-16SRed_bacteria	mus-23S_bacteria	mus-bij_bacteria	mus-bij_bacteria-RY	mus-bij_bacteria-RYKM					Fisher's method across a row
		arb 16S cat	0.554	6e-06	1e-63	2e-06	1e-07	0.1	4e-05	5e-60	0.0004	3e-46					3.2969e-177
		arb 16S gamma	0.706	1e-06	2e-69	7e-57	7e-28	0.115	0.0001	3e-09	9e-65	0.002					5.44103e-220
		arb 23S cat	1e-55	0.569	0.11	0.003	0.005	0.002	0.253	0.019	0.007	0.004					5.84123e-57
		arb 23S gamma	4e-51	0.681	0.027	0.005	0.001	0.003	0.127	0.005	0.0004	0.002					1.0905e-55
		arb reg cat	4e-36	0.002	0.669	3e-05	0.072	0.0002	4e-09	0.102	0.004	0.043					9.85104e-48
		arb reg gamma	1e-86	0.005	0.728	0.008	0.069	0.0001	0.003	0.213	0.004	0.036					1.22814e-87
		arb RY cat	0.002	2e-61	7e-05	0.541	1e-10	0.0003	6e-74	7e-07	0.067	9e-27					1.72377e-170
		arb RY gamma	0.0003	9e-07	2e-06	0.712	9e-07	2e-72	8e-06	2e-07	0.051	2e-07					1.75451e-97
		arb RYMK cat	6e-05	0.002	0.186	0.056	0.433	7e-05	6e-05	0.002	0.017	0.022					2.46107e-14
		arb RYMK gamma	1e-48	0.001	0.08	0.077	0.819	0.0004	3e-07	0.003	0.019	0.203					1.18175e-54
		mus 16S cat	0.121	1e-05	1e-49	8e-67	0.0003	0.538	1e-113	1e-43	0.001	0.0001					1.07594e-268
		mus 16S gamma	0.147	1e-07	8e-93	8e-05	0.002	0.63	1e-07	4e-84	2e-07	1e-33					1.14146e-218
		mus 23S cat	2e-59	0.181	2e-06	0.0001	0.006	9e-05	0.622	0.01	0.007	0.003					4.65101e-68
		mus 23S gamma	2e-128	0.31	0.007	0.002	0.006	8e-31	0.658	0.008	0.0002	0.009					2.8703e-156
		mus reg cat	1e-52	0.005	0.234	2e-07	0.005	7e-05	0.006	0.447	0.003	0.062					1.50762e-60
		mus reg gamma	4e-17	0.019	0.496	0.001	0.015	0.0005	0.015	0.823	0.014	0.089					7.29453e-21
		mus RY cat	0.003	0.0003	4e-28	0.12	0.0001	8e-64	2e-45	3e-69	0.532	0.001					6.25175e-200
		mus RY gamma	1e-06	9e-58	2e-50	0.099	0.0002	2e-06	2e-85	0.002	0.695	2e-05					2.02025e-197
		mus RYMK cat	2e-58	0.008	0.152	0.001	0.093	5e-05	0.002	0.293	0.024	0.493					2.79638e-60
		mus RYMK gamma	3e-08	0.006	0.134	0.0001	0.156	0.0001	0.008	0.331	0.027	0.833					3.10224e-14
	AU scores of the trees with the full complement of species with mitochondria according to the various alignments
			arb-16SRed_all_mt	arb-23S_all_mt	arb-bij_all_mt	arb-bij_all_mt-RY	arb-bij_bacteria_mt-RYKM	mus-16SRed_all_mt	mus-23S_all_mt	mus-bij_all_mt	mus-bij_all_mt-RY	mus-bij_bacteria_mt-RYKM					Fisher's method
		arb 16S mt cat	0.438	1e-45	1e-55	7e-62	2e-46	0.0005	2e-43	4e-10	3e-66	1e-68					0
		arb 16S mt gamma	0.595	7e-45	5e-10	6e-36	1e-74	0.0004	4e-06	4e-68	2e-28	7e-116					0
		arb 23S mt cat	8e-07	0.592	9e-05	1e-52	4e-07	2e-52	0.013	9e-41	9e-05	0.0001					2.23694e-153
		arb 23S mt gamma	2e-05	0.611	0.001	2e-82	9e-06	4e-39	0.005	6e-58	0.001	7e-05					4.77992e-182
		arb reg mt cat	4e-66	0.007	0.612	2e-05	0.052	3e-52	4e-08	0.005	0.002	0.001					2.37854e-124
		arb reg mt gamma	3e-77	0.014	0.75	0.014	0.133	9e-88	1e-05	0.064	0.0002	0.008					5.56874e-163
		arb RY mt cat	2e-08	4e-49	6e-05	0.496	7e-46	2e-36	1e-78	1e-28	0.007	2e-84					0
		arb RY mt gamma	0.0002	2e-68	0.0002	0.662	1e-08	2e-51	2e-10	0.001	0.01	0.0001					4.91249e-136
		arb RYMK mt cat	3e-10	0.001	0.105	0.025	0.484	0.0003	3e-05	0.0005	0.0003	0.013					1.40777e-21
		arb RYMK mt gamma	2e-44	0.001	0.121	0.036	0.785	6e-05	2e-52	5e-05	2e-54	0.007					2.70936e-148
		mus 16S mt cat	0.005	6e-08	6e-05	1e-47	0.001	0.43	0.0001	2e-48	5e-16	1e-52					9.17704e-166
		mus 16S mt gamma	0.002	0.002	5e-37	4e-28	1e-37	0.594	0.0001	7e-36	5e-30	2e-102					1.59688e-257
		mus 23S mt cat	3e-87	0.024	0.0003	5e-49	1e-05	2e-09	0.53	0.012	0.0001	0.0004					2.32575e-146
		mus 23S mt gamma	2e-96	0.038	0.0001	8e-52	1e-22	4e-60	0.574	0.013	0.0002	0.0002					1.09844e-224
		mus reg mt cat	7e-40	0.013	0.059	0.0001	0.0002	1e-35	0.009	0.635	0.0002	0.045					1.3999e-77
		mus reg mt gamma	2e-68	0.0005	0.045	2e-43	0.0005	3e-17	0.011	0.679	0.001	0.068					7.86958e-125
		mus RY mt cat	3e-08	4e-68	0.002	0.043	3e-76	2e-45	4e-07	1e-38	0.315	8e-06					1.1785e-230
		mus RY mt gamma	3e-78	0.001	0.008	0.047	0.0002	3e-106	2e-06	8e-46	0.806	4e-06					6.65214e-231
		mus RYMK mt cat	6e-44	0.003	0.026	0.02	0.053	6e-08	0.001	0.137	0.017	0.4					2.5058e-50
		mus RYMK mt gamma	4e-31	0.001	0.079	0.025	0.104	7e-06	0.001	0.156	0.003	0.812					1.82108e-36
	AU scores of the trees with the full complement of species according to the various alignments. This table includes the trees without mitochondria, the trees with mitochondria pruned of the mitochondria ("pruned") and the trees inferred from the alignments where the mitochondrial sequences where deleted after alignment ("mtDel")
			arb-bij_bacteria-gb	arb-bij_bacteria_mtDel	mus-bij_bacteria-gb	mus-bij_bacteria_mtDel	arb-16SRed_bacteria-gb	mus-16SRed_bacteria-gb	arb-23S_bacteria-gb	mus-23S_bacteria-gb	arb-bij_bacteria-gb-RY	mus-bij_bacteria-gb-RY	arb-bij_bacteria-RYKM	mus-bij_bacteria-RYKM			Fisher's method
		arb reg cat	0.706	0.062	0.147	0.061	1e-59	6e-101	0.002	2e-60	0.003	0.004	0.079	0.032			7.582e-211
		arb reg gamma	0.763	0.069	0.269	0.17	8e-53	3e-37	0.009	0.003	0.001	8e-05	0.108	0.055			3.25345e-87
		arb reg cat pruned of mt	0.077	0.502	0.045	0.039	5e-05	7e-07	0.004	0.0003	0.006	0.01	0.02	0.02			1.75434e-16
		arb reg gamma pruned of mt	0.096	0.528	0.094	0.072	7e-50	0.0001	0.001	0.001	1e-05	0.005	0.007	0.009			7.24617e-58
		mus reg cat	0.248	0.069	0.527	0.093	7e-47	1e-45	0.004	0.02	0.013	0.011	0.007	0.111			2.32676e-87
		mus reg gamma	0.572	0.1	0.85	0.344	1e-37	1e-10	0.014	0.03	0.004	0.006	0.016	0.116			2.72103e-44
		mus reg cat pruned of mt	0.135	0.155	0.26	0.609	3e-05	3e-05	0.001	0.001	0.0002	7e-155	0.005	0.04			1.2591e-158
		mus reg gamma pruned of mt	0.067	0.048	0.123	0.55	8e-79	2e-10	0.001	0.002	0.002	5e-08	0.0004	0.007			1.83414e-94
		arb 16S cat	0.003	0.007	4e-43	6e-06	0.6	0.107	7e-33	2e-51	2e-05	7e-07	2e-87	2e-45			4.8946e-256
		arb 16S gamma	2e-05	0.001	5e-68	0.0002	0.762	0.125	7e-95	2e-30	6e-58	5e-52	8e-53	3e-59			0
		arb 16S cat pruned of mt	8e-05	1e-48	3e-71	8e-28	0.013	0.004	3e-07	9e-09	1e-34	4e-57	6e-62	9e-46			0
		arb 16S gamma pruned of mt	2e-53	3e-67	6e-05	8e-53	0.002	0.003	2e-08	8e-115	3e-05	2e-31	1e-86	2e-37			0
		mus 16S cat	3e-51	0.001	2e-06	2e-10	0.141	0.637	2e-47	1e-40	0.0003	2e-05	1e-115	3e-131			0
		mus 16S gamma	4e-68	0.0002	0.0004	9e-75	0.161	0.673	3e-07	0.001	4e-05	0.0002	1e-71	0.0002			6.10724e-220
		mus 16S cat pruned of mt	5e-35	6e-05	0.0001	7e-06	0.135	0.157	3e-120	0.001	4e-57	0.0001	6e-10	8e-67			1.46755e-284
		mus 16S gamma pruned of mt	1e-09	0.0003	0.0002	6e-06	0.043	0.133	1e-11	0.0002	0.0002	0.0004	1e-12	2e-08			1.54936e-49
		arb 23S cat	0.134	0.005	0.021	0.019	0.003	2e-06	0.59	0.288	0.011	0.003	0.0001	0.001			1.48932e-15
		arb 23S gamma	0.028	3e-05	0.0002	0.003	6e-05	0.001	0.76	0.17	0.008	0.0002	0.0002	0.007			9.10982e-20
		arb 23S cat pruned of mt	1e-08	2e-06	1e-52	7e-45	4e-77	1e-18	0.031	0.004	0.001	2e-60	1e-06	1e-06			3.16581e-260
		arb 23S cat pruned of mt	1e-08	2e-06	1e-52	7e-45	4e-77	1e-18	0.031	0.004	0.001	2e-60	1e-06	1e-06			3.16581e-260
		mus 23S cat	0.005	0.002	0.018	8e-05	0.0003	5e-32	0.197	0.685	0.007	0.004	0.005	0.01			1.62354e-40
		mus 23S gamma	0.003	9e-05	0.01	0.008	0.102	2e-58	0.324	0.692	0.01	0.002	0.005	0.002			4.18757e-63
		mus 23S cat pruned of mt	0.001	0.004	0.006	0.043	8e-08	4e-06	0.033	0.13	0.005	0.005	0.003	2e-07			1.27339e-24
		mus 23S gamma pruned of mt	0.006	6e-05	0.009	0.026	2e-54	1e-07	0.024	0.243	4e-05	0.001	0.001	0.005			9.21599e-69
		arb RY cat	6e-65	1e-05	0.0003	0.001	0.001	5e-69	7e-68	2e-82	0.607	0.081	4e-09	2e-31			0
		arb RY gamma	1e-37	3e-85	6e-47	4e-61	1e-05	1e-46	3e-70	4e-108	0.769	0.059	4e-05	0.0005			0
		arb RY cat pruned of mt	6e-49	3e-05	6e-54	3e-70	4e-32	3e-31	1e-05	1e-54	0.099	0.033	5e-07	0.0003			1.13543e-285
		arb RY gamma pruned of mt	3e-05	0.002	5e-37	5e-51	7e-06	4e-05	0.0001	2e-71	0.081	0.024	5e-06	0.0001			2.3697e-169
		mus RY cat	4e-45	2e-124	0.001	9e-39	4e-47	2e-11	0.0002	3e-96	0.141	0.599	0.005	0.0003			0
		mus RY gamma	6e-90	1e-05	5e-06	5e-89	2e-44	1e-41	0.0002	6e-87	0.116	0.763	0.0001	0.001			0
		mus RY cat pruned of mt	5e-63	8e-05	1e-61	3e-66	3e-53	9e-57	8e-55	2e-12	0.056	0.051	7e-74	5e-45			0
		mus RY gamma pruned of mt	8e-39	0.0001	7e-06	5e-58	3e-32	3e-52	3e-82	8e-52	0.096	0.126	3e-39	2e-10			0
		arb RYMK cat	0.188	0.018	0.005	5e-06	4e-75	5e-34	0.002	3e-06	0.064	0.032	0.469	0.036			1.63974e-111
		arb RYMK gamma	0.114	0.016	0.004	3e-05	0.003	9e-44	0.002	0.001	0.081	0.021	0.872	0.288			1.0228e-48
		arb RYMK cat pruned of mt	0.006	0.174	6e-07	8e-05	7e-07	3e-44	0.001	8e-06	0.004	0.0002	0.028	0.043			1.81201e-63
		arb RYMK gamma pruned of mt	0.009	0.308	0.007	3e-06	9e-07	4e-80	0.0003	3e-06	0.004	0.004	0.069	0.104			1.83972e-93
		mus RYMK cat	0.2	0.053	0.341	0.162	5e-06	1e-95	0.011	0.006	0.013	0.049	0.095	0.566			5.91351e-94
		mus RYMK gamma	0.228	0.135	0.452	0.189	1e-07	8e-165	0.014	0.005	0.071	0.024	0.212	0.875			8.05148e-161
		mus RYMK cat pruned of mt	0.02	0.056	0.04	0.24	6e-46	2e-46	7e-06	1e-05	0.039	0.025	0.11	0.206			1.54153e-92
		mus RYMK gamma pruned of mt	0.083	0.145	0.1	0.262	2e-46	2e-134	1e-07	0.0001	0.032	0.022	0.208	0.357			3.02399e-177
		arb cat mtDel	0.036	0.572	0.015	0.03	1e-48	0.001	0.002	8e-73	0.002	0.008	0.007	0.007			1.1716e-120
		arb gamma mtDel	0.034	0.757	0.013	0.022	9e-05	3e-08	5e-05	6e-23	0.006	0.001	0.011	0.011			9.33392e-38
		mus cat mtDel	0.156	0.078	0.314	0.612	2e-06	7e-06	0.002	0.008	0.001	0.0004	0.004	0.026			6.75248e-17
		mus gamma mtDel	0.233	0.086	0.341	0.728	3e-10	3e-28	1e-05	0.001	0.001	0.0002	0.007	0.017			6.97028e-43
	AU scores of the trees with the trimmed complement of species without mitochondria according to the various alignments
			arb-bij_trimmed-gb	mus-bij_trimmed-gb	arb-bij_trimmed-gb-RY	mus-bij_trimmed-gb-RY	arb-bij_trimmed-gb-RYKM	mus-bij_trimmed-gb-RYKM									Fisher's method
		arb cat trimmed	0.618	0.062	0.009	0.002	0.147	0.045									0.000131522
		arb gamma trimmed	0.8	0.15	0.044	0.004	0.164	0.118									0.00341096
		mus cat trimmed	0.09	0.663	0.014	0.049	0.061	0.464									0.00690918
		mus gamma trimmed	0.203	0.673	0.013	0.02	0.103	0.284									0.00642461
		arb cat RY trimmed	2e-05	2e-40	0.603	0.089	0.007	0.002									5.57323e-43
		arb gamma RY trimmed	0.0001	4e-08	0.83	0.076	0.009	0.0002									5.7503e-13
		mus cat RY trimmed	0.001	0.003	0.27	0.616	0.025	0.144									6.47251e-05
		mus gamma RY trimmed	0.005	0.004	0.334	0.822	0.015	0.189									0.000329282
		arb cat RYMK trimmed	0.098	0.002	0.166	0.053	0.669	0.17									0.00204817
		arb gamma RYMK trimmed	0.071	8e-06	0.081	0.007	0.789	0.102									2.31107e-06
		mus RYMK cat trimmed	0.116	0.338	0.066	0.071	0.208	0.68									0.0487094
		mus RYMK gamma trimmed	0.04	0.04	0.115	0.124	0.217	0.81									0.0155338
		arb cat pruned	0.07	0.006	0.005	0.001	0.072	0.007									1.70227e-07
		arb gamma pruned	0.044	0.001	0.012	0.001	0.085	0.001									1.21655e-08
		mus cat pruned	5e-31	2e-38	0.1	0.007	0.001	0.001									1.06204e-68
		mus gamma pruned	8e-60	8e-37	0.172	0.004	0.001	0.008									2.29957e-94
		arb cat RY pruned	0.211	0.098	0.002	0.0002	0.091	0.054									3.31617e-06
		arb gamma RY pruned	0.085	0.037	0.004	0.004	0.053	0.04									7.15514e-06
		mus cat RY pruned	7e-06	4e-05	0.173	0.069	0.01	2e-06									1.05076e-13
		mus gamma RY pruned	2e-44	6e-63	0.17	0.093	0.001	5e-06									1.09616e-106
		arb RYMK cat pruned	0.036	2e-07	0.033	0.002	0.15	0.001									4.85394e-11
		arb RYMK gamma pruned	0.015	0.001	0.035	0.015	0.165	0.069									6.23304e-06
		mus RYMK cat pruned	0.024	0.0003	0.001	0.0004	0.093	0.027									2.58982e-09
		mus RYMK gamma pruned	0.022	0.013	0.003	0.002	0.169	0.083									2.17753e-06
	AU scores of the trees with the trimmed complement of species with mitochondria according to the various alignments
			arb-bij_trimmed_mt-gb	mus-bij_trimmed_mt-gb	arb-bij_trimmed_mt-gb-RY	mus-bij_trimmed_mt-gb-RY	arb-bij_trimmed_mt-gb-RYKM	mus-bij_trimmed_mt-gb-RYKM									Fisher's method
		arb cat trimmed	0.616	0.112	0.002	0.005	0.114	0.061									0.000136614
		arb gamma trimmed	0.764	0.132	0.035	0.004	0.224	0.094									0.00273763
		mus cat trimmed	0.106	0.678	0.009	0.0001	0.002	0.081									1.11208e-06
		mus gamma trimmed	0.22	0.72	2e-05	0.0001	0.013	0.019									1.94246e-08
		arb cat RY trimmed	0.001	0.005	0.625	0.031	0.0005	7e-08									3.38538e-12
		arb gamma RY trimmed	0.001	2e-56	0.831	0.06	3e-07	9e-10									3.68445e-67
		mus cat RY trimmed	4e-81	6e-09	0.164	0.513	0.0001	0.0001									9.91163e-89
		mus gamma RY trimmed	5e-70	3e-05	0.161	0.704	4e-05	5e-05									7.6281e-75
		arb cat RYMK trimmed	0.003	0.0005	0.045	0.005	0.515	0.14									2.19669e-06
		arb gamma RYMK trimmed	0.028	0.001	0.077	0.007	0.798	0.115									5.30193e-05
		mus RYMK cat trimmed	0.093	0.243	0.002	0.008	0.042	0.63									0.000229338
		mus RYMK gamma trimmed	0.024	0.153	0.022	0.004	0.117	0.802									0.000537633
		arb cat pruned	0.029	0.015	7e-106	1e-88	0.021	0.006									6.76454e-190
		arb gamma pruned	0.023	0.026	5e-05	0.001	0.023	0.019									4.2827e-09
		mus cat pruned	2e-07	0.003	0.102	0.004	0.001	3e-38									1.74848e-45
		mus gamma pruned	1e-06	0.002	0.097	0.006	4e-09	0.0003									6.39045e-18
		arb cat RY pruned	0.036	0.056	1e-25	0.001	0.007	0.012									4.94764e-28
		arb gamma RY pruned	0.009	0.01	0.003	2e-46	0.001	1e-05									2.40175e-52
		mus cat RY pruned	5e-12	2e-24	0.033	0.016	0.006	9e-42									5.69598e-73
		mus gamma RY pruned	2e-13	0.0001	0.053	0.052	8e-74	0.001									1.9186e-86
		arb RYMK cat pruned	0.03	0.006	0.009	0.001	0.024	0.019									1.26436e-07
		arb RYMK gamma pruned	0.009	6e-05	0.023	2e-08	0.024	0.004									4.19527e-14
		mus RYMK cat pruned	0.079	0.036	0.006	0.006	0.026	0.12									1.69834e-05
		mus RYMK gamma pruned	0.039	0.054	0.013	0.002	0.05	0.119									1.72476e-05

## Sheet: RF distance
	arb 16S cat	arb 16S gamma	arb 23S cat	arb 23S gamma	arb reg cat	arb reg gamma	arb RY cat	arb RY gamma	arb RYMK cat	arb RYMK gamma	mus 16S cat	mus 16S gamma	mus 23S cat	mus 23S gamma	mus reg cat	mus reg gamma	mus RY cat	mus RY gamma	mus RYMK cat	mus RYMK gamma	arb 16S mt cat	arb 16S mt gamma	arb 23S mt cat	arb 23S mt gamma	arb reg mt cat	arb reg mt gamma	arb RY mt cat	arb RY mt gamma	arb RYMK mt cat	arb RYMK mt gamma	mus 16S mt cat	mus 16S mt gamma	mus 23S mt cat	mus 23S mt gamma	mus reg mt cat	mus reg mt gamma	mus RY mt cat	mus RY mt gamma	mus RYMK mt cat	mus RYMK mt gamma	arb cat mtDel	arb gamma mtDel	mus cat mtDel	mus gamma mtDel
arb_16S_cat	0	7	78	80	63	62	66	68	65	65	35	33	76	77	65	67	66	68	66	64	35	36	78	79	63	62	73	74	64	63	39	40	79	79	66	63	72	71	65	66	62	66	66	66
arb_16S_gamma	7	0	80	82	66	65	67	69	67	67	37	35	78	79	66	69	67	69	68	66	38	40	80	81	65	64	75	75	66	65	41	42	81	81	68	65	73	72	67	68	64	68	68	68
arb_23S_cat	78	80	0	6	26	25	55	60	34	34	76	71	14	14	20	19	54	54	28	29	78	78	32	31	32	32	58	61	43	41	72	72	19	18	26	33	57	56	38	35	35	37	25	25
arb_23S_gamma	80	82	6	0	30	29	55	59	37	37	78	73	15	15	23	22	53	54	29	32	80	80	35	34	36	36	58	61	46	45	74	75	17	16	28	36	58	58	42	38	38	40	27	27
arb_reg_cat	63	66	26	30	0	6	45	52	15	21	63	56	24	25	18	16	42	47	19	18	67	68	39	40	26	26	55	56	31	31	58	59	34	33	25	31	50	50	28	24	28	28	26	26
arb_reg_gamma	62	65	25	29	6	0	46	54	17	23	61	55	24	26	17	15	46	46	15	14	67	68	37	38	24	24	56	57	31	30	57	58	35	34	24	27	50	50	26	22	26	26	25	25
arb_RY_cat	66	67	55	55	45	46	0	18	39	36	67	61	51	51	48	48	30	39	39	42	68	68	53	53	46	46	33	36	41	41	66	65	56	57	53	53	41	40	42	44	46	46	54	52
arb_RY_gamma	68	69	60	59	52	54	18	0	46	41	67	61	57	57	53	53	34	42	46	48	69	70	58	59	51	51	33	36	42	46	66	66	56	57	52	52	38	38	43	44	49	51	53	51
arb_RYMK_cat	65	67	34	37	15	17	39	46	0	11	67	62	32	31	23	22	35	43	16	14	68	70	44	45	29	29	51	52	29	28	65	64	42	41	33	34	50	50	32	26	30	27	34	34
arb_RYMK_gamma	65	67	34	37	21	23	36	41	11	0	68	63	38	35	27	29	34	43	21	19	69	71	40	41	28	28	46	47	24	23	65	64	44	43	32	33	46	47	29	27	31	32	33	33
mus_16S_cat	35	37	76	78	63	61	67	67	67	68	0	18	73	76	64	65	66	64	66	64	46	44	75	76	59	58	70	69	60	62	21	23	76	75	63	60	66	66	61	61	60	62	63	63
mus_16S_gamma	33	35	71	73	56	55	61	61	62	63	18	0	69	72	58	59	63	62	60	58	42	41	72	73	56	55	66	65	58	60	26	30	71	71	57	57	65	65	57	57	57	59	57	57
mus_23S_cat	76	78	14	15	24	24	51	57	32	38	73	69	0	4	17	15	47	49	22	25	78	78	36	35	36	36	57	58	42	42	70	71	15	13	26	35	53	52	36	33	38	36	25	25
mus_23S_gamma	77	79	14	15	25	26	51	57	31	35	76	72	4	0	19	19	48	52	23	27	81	81	39	38	39	39	60	61	45	43	73	74	17	15	30	39	55	53	39	36	39	39	29	29
mus_reg_cat	65	66	20	23	18	17	48	53	23	27	64	58	17	19	0	7	41	44	17	14	70	71	37	38	29	29	57	55	37	35	60	61	28	27	16	28	51	49	32	28	31	33	15	17
mus_reg_gamma	67	69	19	22	16	15	48	53	22	29	65	59	15	19	7	0	43	43	15	15	67	69	37	38	29	27	54	55	36	36	61	62	26	25	16	28	51	50	29	25	33	28	15	15
mus_RY_cat	66	67	54	53	42	46	30	34	35	34	66	63	47	48	41	43	0	19	36	37	68	72	52	53	47	45	41	40	44	46	69	68	54	52	44	47	37	37	40	41	48	45	45	46
mus_RY_gamma	68	69	54	54	47	46	39	42	43	43	64	62	49	52	44	43	19	0	43	41	68	70	50	50	46	44	41	40	47	48	68	67	56	54	46	48	38	35	37	40	49	43	47	48
mus_RYMK_cat	66	68	28	29	19	15	39	46	16	21	66	60	22	23	17	15	36	43	0	8	69	71	38	39	24	22	51	52	30	29	62	63	33	32	25	27	47	47	23	19	24	22	26	26
mus_RYMK_gamma	64	66	29	32	18	14	42	48	14	19	64	58	25	27	14	15	37	41	8	0	67	68	36	37	21	21	53	54	27	26	60	61	36	35	22	25	46	46	22	16	25	20	23	23
arb_16S_mt_cat	35	38	78	80	67	67	68	69	68	69	46	42	78	81	70	67	68	68	69	67	0	15	78	79	67	66	71	74	64	67	46	46	79	80	69	65	69	70	67	66	67	65	70	70
arb_16S_mt_gamma	36	40	78	80	68	68	68	70	70	71	44	41	78	81	71	69	72	70	71	68	15	0	79	79	67	67	72	75	64	67	47	45	79	80	70	66	70	71	68	67	67	67	71	71
arb_23S_mt_cat	78	80	32	35	39	37	53	58	44	40	75	72	36	39	37	37	52	50	38	36	78	79	0	2	28	30	53	53	36	33	72	71	34	34	33	36	49	51	36	37	35	34	34	35
arb_23S_mt_gamma	79	81	31	34	40	38	53	59	45	41	76	73	35	38	38	38	53	50	39	37	79	79	2	0	29	31	52	52	38	34	73	72	33	33	34	37	50	52	37	38	36	35	35	36
arb_reg_mt_cat	63	65	32	36	26	24	46	51	29	28	59	56	36	39	29	29	47	46	24	21	67	67	28	29	0	2	50	51	26	22	57	57	35	37	22	21	45	45	23	23	10	9	23	23
arb_reg_mt_gamma	62	64	32	36	26	24	46	51	29	28	58	55	36	39	29	27	45	44	22	21	66	67	30	31	2	0	48	49	28	24	57	57	36	36	20	19	44	44	21	21	12	9	21	21
arb_RY_mt_cat	73	75	58	58	55	56	33	33	51	46	70	66	57	60	57	54	41	41	51	53	71	72	53	52	50	48	0	15	40	41	72	69	60	59	53	53	50	48	46	48	51	51	54	52
arb_RY_mt_gamma	74	75	61	61	56	57	36	36	52	47	69	65	58	61	55	55	40	40	52	54	74	75	53	52	51	49	15	0	46	45	70	68	60	59	51	53	47	47	50	51	55	53	53	54
arb_RYMK_mt_cat	64	66	43	46	31	31	41	42	29	24	60	58	42	45	37	36	44	47	30	27	64	64	36	38	26	28	40	46	0	9	63	61	44	44	32	31	44	44	20	18	20	25	33	31
arb_RYMK_mt_gamma	63	65	41	45	31	30	41	46	28	23	62	60	42	43	35	36	46	48	29	26	67	67	33	34	22	24	41	45	9	0	62	60	44	44	32	33	47	48	22	22	20	23	34	32
mus_16S_mt_cat	39	41	72	74	58	57	66	66	65	65	21	26	70	73	60	61	69	68	62	60	46	47	72	73	57	57	72	70	63	62	0	5	71	72	60	59	63	64	61	60	61	60	60	60
mus_16S_mt_gamma	40	42	72	75	59	58	65	66	64	64	23	30	71	74	61	62	68	67	63	61	46	45	71	72	57	57	69	68	61	60	5	0	72	73	61	57	63	64	62	60	62	61	61	61
mus_23S_mt_cat	79	81	19	17	34	35	56	56	42	44	76	71	15	17	28	26	54	56	33	36	79	79	34	33	35	36	60	60	44	44	71	72	0	3	24	31	54	54	39	36	37	38	24	24
mus_23S_mt_gamma	79	81	18	16	33	34	57	57	41	43	75	71	13	15	27	25	52	54	32	35	80	80	34	33	37	36	59	59	44	44	72	73	3	0	24	31	54	54	38	33	39	40	24	24
mus_reg_mt_cat	66	68	26	28	25	24	53	52	33	32	63	57	26	30	16	16	44	46	25	22	69	70	33	34	22	20	53	51	32	32	60	61	24	24	0	12	44	44	23	20	28	25	2	4
mus_reg_mt_gamma	63	65	33	36	31	27	53	52	34	33	60	57	35	39	28	28	47	48	27	25	65	66	36	37	21	19	53	53	31	33	59	57	31	31	12	0	45	44	24	21	27	24	14	16
mus_RY_mt_cat	72	73	57	58	50	50	41	38	50	46	66	65	53	55	51	51	37	38	47	46	69	70	49	50	45	44	50	47	44	47	63	63	54	54	44	45	0	11	36	36	48	43	45	46
mus_RY_mt_gamma	71	72	56	58	50	50	40	38	50	47	66	65	52	53	49	50	37	35	47	46	70	71	51	52	45	44	48	47	44	48	64	64	54	54	44	44	11	0	32	36	45	43	45	45
mus_RYMK_mt_cat	65	67	38	42	28	26	42	43	32	29	61	57	36	39	32	29	40	37	23	22	67	68	36	37	23	21	46	50	20	22	61	62	39	38	23	24	36	32	0	10	24	22	24	22
mus_RYMK_mt_gamma	66	68	35	38	24	22	44	44	26	27	61	57	33	36	28	25	41	40	19	16	66	67	37	38	23	21	48	51	18	22	60	60	36	33	20	21	36	36	10	0	25	22	21	19
arb_cat_mtDel	62	64	35	38	28	26	46	49	30	31	60	57	38	39	31	33	48	49	24	25	67	67	35	36	10	12	51	55	20	20	61	62	37	39	28	27	48	45	24	25	0	11	29	27
arb_gamma_mtDel	66	68	37	40	28	26	46	51	27	32	62	59	36	39	33	28	45	43	22	20	65	67	34	35	9	9	51	53	25	23	60	61	38	40	25	24	43	43	22	22	11	0	26	26
mus_cat_mtDel	66	68	25	27	26	25	54	53	34	33	63	57	25	29	15	15	45	47	26	23	70	71	34	35	23	21	54	53	33	34	60	61	24	24	2	14	45	45	24	21	29	26	0	2
mus_gamma_mtDel	66	68	25	27	26	25	52	51	34	33	63	57	25	29	17	15	46	48	26	23	70	71	35	36	23	21	52	54	31	32	60	61	24	24	4	16	46	45	22	19	27	26	2	0
